# Supplementary material
Source: PubMed Central journal article supplement (PMC2532082)
Supplement: NIHMS62659-supplement-1File001.pdf [file NIHMS62659-supplement-1File001.pdf]

**Supplementary Material for:**

**Periodic Trends within a Series of Five Coordinate, Thiolate–Ligated  
[M<sup>II</sup>(S<sup>Me</sup><sub>2</sub>N<sub>4</sub>(tren))]<sup>+</sup> (M = Mn, Fe, Co, Ni, Cu, Zn) Complexes,  
Including a Rare Example of a Stable Cu<sup>II</sup>–Thiolate**

Lisa M. Brines, Jason Shearer, Jessica K. Fender, Dirk Schweitzer, Steven C. Shoner,  
David Barnhart,<sup>§</sup> Werner Kaminsky,<sup>§</sup> Scott Lovell,<sup>§</sup> and Julie A. Kovacs\*

The Department of Chemistry, University of Washington: Box 351700 Seattle, WA  
98195-1700

### **Supplementary Figures:**

**Figure S-1.** Chemdrawing of  $[\text{Ni}^{\text{II}}(\text{SN}_4(\text{tren})\text{-RS}^{\text{dang}})]_2 \cdot 2\text{H}_2\text{O}$  (**3**) showing the co-crystallized  $\text{H}_2\text{O}$  molecules H-bonded to the “dangling” thiolate sulfur.

**Figure S-2.** Packing diagram for  $[\text{Ni}^{\text{II}}(\text{SN}_4(\text{tren})\text{-RS}^{\text{dang}})]_2 \cdot 2\text{H}_2\text{O}$  (**3**) showing intermolecular H-bonds to the “dangling” thiolate sulfur.

**Figure S-3.** A d-orbital splitting diagram illustrating why the trigonal bipyramidal Cu-S bond is not longer than the Ni-S bond, as would be predicted by Shannon radii.

**Figure S-4.** A d-orbital splitting diagram illustrating why  $\text{Ni}^{2+}$  adopts an  $\sim$  square pyramidal structure. A distorted trigonal-bipyramidal  $\text{Ni}^{2+}$  structure would have a pair of electrons pointing approximately towards one of the nitrogens in the trigonal plane ( $d_{xy}$ ). By rearranging to a square pyramidal geometry, each ligand has only one electron pointing directly towards it, and the doubly populated  $\sigma^*$  orbital converts to a  $\pi^*$ , resulting in a structure with stronger bonds.

**Figure S-5.** Electronic absorption spectrum of  $[\text{Co}^{\text{II}}(\text{S}^{\text{Me}2}\text{N}_4(\text{tren}))](\text{PF}_6)$  (**6**) in MeCN at ambient temperature.

**Figure S-6.** Electronic absorption spectrum of  $[\text{Mn}^{\text{II}}(\text{S}^{\text{Me}2}\text{N}_4(\text{tren}))](\text{PF}_6)$  (**5**) in MeCN at ambient temperature.

**Figure S-7.** Electronic absorption spectrum of  $[\text{Ni}^{\text{II}}(\text{S}^{\text{Me}2}\text{N}_4(\text{tren}))]\text{Cl}$  (**4**) in MeCN at ambient temperature.

**Figure S-8.** Electronic absorption spectrum of  $[\text{Cu}^{\text{II}}(\text{S}^{\text{Me}2}\text{N}_4(\text{tren}))](\text{PF}_6)$  (**7**) in  $\text{H}_2\text{O}$  at ambient temperature.

**Figure S-9.**  $^1\text{H}$  NMR (298 K) of  $[\text{Ni}^{\text{II}}(\text{S}^{\text{Me}2}\text{N}_4(\text{tren}))]\text{Cl}$  (**4**) showing that it is paramagnetic.

**Figure S-10.** Inverse molar magnetic susceptibility ( $1/\chi_m$ ) vs. temperature (T) plot for  $[\text{Mn}^{\text{II}}(\text{S}^{\text{Me}2}\text{N}_4(\text{tren}))](\text{PF}_6)$  (**5**) fit to an  $S = 5/2$  spin-state.

**Figure S-11.** Inverse molar magnetic susceptibility ( $1/\chi_m$ ) vs. temperature (T) plot for  $[[\text{Ni}^{\text{II}}(\text{S}^{\text{Me}2}\text{N}_4(\text{tren}))]\text{Cl}$  (**4**) fit to an  $S = 1$  spin-state.

**Figure S-12.** X-band EPR spectrum of  $S = 3/2$   $[\text{Co}^{\text{II}}(\text{S}^{\text{Me}2}\text{N}_4(\text{tren}))](\text{PF}_6)$  (**6**) at 5 K in MeOH/EtOH (9:1) glass.

**Figure S-13.** Cyclic voltammogram of  $[\text{Ni}^{\text{II}}(\text{S}^{\text{Me}2}\text{N}_4(\text{tren}))]\text{Cl}$  (**4**) in MeCN at 298 K (0.1 M  $(\text{Bu}_4\text{N})\text{PF}_6$ , glassy carbon electrode, 150 mV/sec scan rate). Peak potentials versus SCE indicated.

**Figure S-14.** Cyclic voltammogram of  $[\text{Cu}^{\text{II}}(\text{S}^{\text{Me}2}\text{N}_4(\text{tren}))](\text{PF}_6)$  (**7**) in MeCN at 298 K (0.1 M  $(\text{Bu}_4\text{N})\text{PF}_6$ , glassy carbon electrode, 150 mV/sec scan rate). Peak potentials versus SCE indicated.

**Figure S-15.** Cyclic voltammogram of  $[\text{Zn}^{\text{II}}(\text{S}^{\text{Me}_2}\text{N}_4(\text{tren}))](\text{PF}_6)$  (**8**) in MeCN at 298 K (0.1 M  $(\text{Bu}_4\text{N})\text{PF}_6$ , glassy carbon electrode, 150 mV/sec scan rate), showing its ligand-centered oxidation wave. Peak potentials versus SCE indicated.

**Supplementary Tables:**

**Table S-1.** Crystal Data for  $[\text{Ni}^{\text{II}}(\text{SN}_4(\text{tren})-\text{RS}^{\text{dang}})]_2 \cdot 2\text{H}_2\text{O}$  (**3**).

**Table S-2.** Positional and Equivalent Isotropic Thermal Parameters for  $[\text{Ni}^{\text{II}}(\text{SN}_4(\text{tren})-\text{RS}^{\text{dang}})]_2 \cdot 2\text{H}_2\text{O}$  (**3**).

**Table S-3.** Bond Distances (Å) and Angles (deg) for  $[\text{Ni}^{\text{II}}(\text{SN}_4(\text{tren})-\text{RS}^{\text{dang}})]_2 \cdot 2\text{H}_2\text{O}$  (**3**).

**Table S-4.** Intramolecular and Intermolecular S...H contacts (Å) and X-H-S angles (deg) for  $[\text{Ni}^{\text{II}}(\text{SN}_4(\text{tren})-\text{RS}^{\text{dang}})]_2 \cdot 2\text{H}_2\text{O}$  (**3**)

**Table S-5.** Crystal Data for  $[\text{Ni}^{\text{II}}(\text{S}^{\text{Me}_2}\text{N}_4(\text{tren}))]\text{Cl}$  (**4**)

**Table S-6.** Positional and Equivalent Isotropic Thermal Parameters for  $[\text{Ni}^{\text{II}}(\text{S}^{\text{Me}_2}\text{N}_4(\text{tren}))]\text{Cl}$  (**4**)

**Table S-7.** Bond Distances (Å) and Angles (deg) for  $[\text{Ni}^{\text{II}}(\text{S}^{\text{Me}_2}\text{N}_4(\text{tren}))]\text{Cl}$  (**4**)

**Table S-8.** Anisotropic Thermal Parameters for  $[\text{Ni}^{\text{II}}(\text{S}^{\text{Me}_2}\text{N}_4(\text{tren}))]\text{Cl}$  (**4**)

**Table S-9.** Hydrogen Atoms for  $[\text{Ni}^{\text{II}}(\text{S}^{\text{Me}_2}\text{N}_4(\text{tren}))]\text{Cl}$  (**4**)

**Table S-10.** Crystal Data for  $[\text{Mn}^{\text{II}}(\text{S}^{\text{Me}_2}\text{N}_4(\text{tren}))](\text{PF}_6)$  (**5**)

**Table S-11.** Positional and Equivalent Isotropic Thermal Parameters for  $[\text{Mn}^{\text{II}}(\text{S}^{\text{Me}_2}\text{N}_4(\text{tren}))](\text{PF}_6)$  (**5**)

**Table S-12.** Bond Distances (Å) and Angles (deg) for  $[\text{Mn}^{\text{II}}(\text{S}^{\text{Me}_2}\text{N}_4(\text{tren}))](\text{PF}_6)$  (**5**)

**Table S-13.** Anisotropic Thermal Parameters for  $[\text{Mn}^{\text{II}}(\text{S}^{\text{Me}_2}\text{N}_4(\text{tren}))](\text{PF}_6)$  (**5**).

**Table S-14.** Hydrogen Atoms for  $[\text{Mn}^{\text{II}}(\text{S}^{\text{Me}_2}\text{N}_4(\text{tren}))](\text{PF}_6)$  (**5**).

**Table S-15.** Crystal Data for  $[\text{Co}^{\text{II}}(\text{S}^{\text{Me}_2}\text{N}_4(\text{tren}))](\text{PF}_6)$  (**6**)

**Table S-16.** Positional and Equivalent Isotropic Thermal Parameters for  $[\text{Co}^{\text{II}}(\text{S}^{\text{Me}_2}\text{N}_4(\text{tren}))](\text{PF}_6)$  (**6**)

**Table S-17.** Bond Distances (Å) and Angles (deg) for  $[\text{Co}^{\text{II}}(\text{S}^{\text{Me}_2}\text{N}_4(\text{tren}))](\text{PF}_6)$  (**6**)

**Table S-18.** Anisotropic Thermal Parameters for  $[\text{Co}^{\text{II}}(\text{S}^{\text{Me}_2}\text{N}_4(\text{tren}))](\text{PF}_6)$  (**6**).

**Table S-19.** Hydrogen Atoms for  $[\text{Co}^{\text{II}}(\text{S}^{\text{Me}_2}\text{N}_4(\text{tren}))](\text{PF}_6)$  (**6**).

**Table S-20.** Crystal Data for  $[\text{Cu}^{\text{II}}(\text{S}^{\text{Me}_2}\text{N}_4(\text{tren}))](\text{PF}_6)$  (**7**)

**Table S-21.** Positional and Equivalent Isotropic Thermal Parameters for  $[\text{Cu}^{\text{II}}(\text{S}^{\text{Me}_2}\text{N}_4(\text{tren}))](\text{PF}_6)$  (**7**)

**Table S-22.** Bond Distances (Å) and Angles (deg) for  $[\text{Cu}^{\text{II}}(\text{S}^{\text{Me}_2}\text{N}_4(\text{tren}))](\text{PF}_6)$  (**7**)

**Table S-23.** Anisotropic Thermal Parameters for  $[\text{Cu}^{\text{II}}(\text{S}^{\text{Me}_2}\text{N}_4(\text{tren}))](\text{PF}_6)$  (**7**)

**Table S-24.** Hydrogen Atoms for  $[\text{Cu}^{\text{II}}(\text{S}^{\text{Me}_2}\text{N}_4(\text{tren}))](\text{PF}_6)$  (**7**)

**Table S-25.** Crystal Data for  $[\text{Zn}^{\text{II}}(\text{S}^{\text{Me}_2}\text{N}_4(\text{tren}))](\text{PF}_6)$  (**8**)

**Table S-26.** Positional and Equivalent Isotropic Thermal Parameters for  $[\text{Zn}^{\text{II}}(\text{S}^{\text{Me}_2}\text{N}_4(\text{tren}))](\text{PF}_6)$  (**8**)

**Table S-27.** Bond Distances (Å) and Angles (deg) for  $[\text{Zn}^{\text{II}}(\text{S}^{\text{Me}_2}\text{N}_4(\text{tren}))](\text{PF}_6)$  (**8**)

**Table S–28.** Anisotropic Thermal Parameters for  $[\text{Zn}^{\text{II}}(\text{S}^{\text{Me}_2}\text{N}_4(\text{tren}))](\text{PF}_6)$  (**8**)

**Table S–29.** Hydrogen Atoms for  $[\text{Zn}^{\text{II}}(\text{S}^{\text{Me}_2}\text{N}_4(\text{tren}))](\text{PF}_6)$  (**8**)

## Figures.

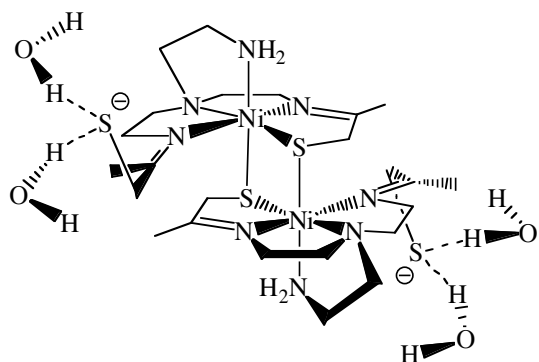

Figure S-1.

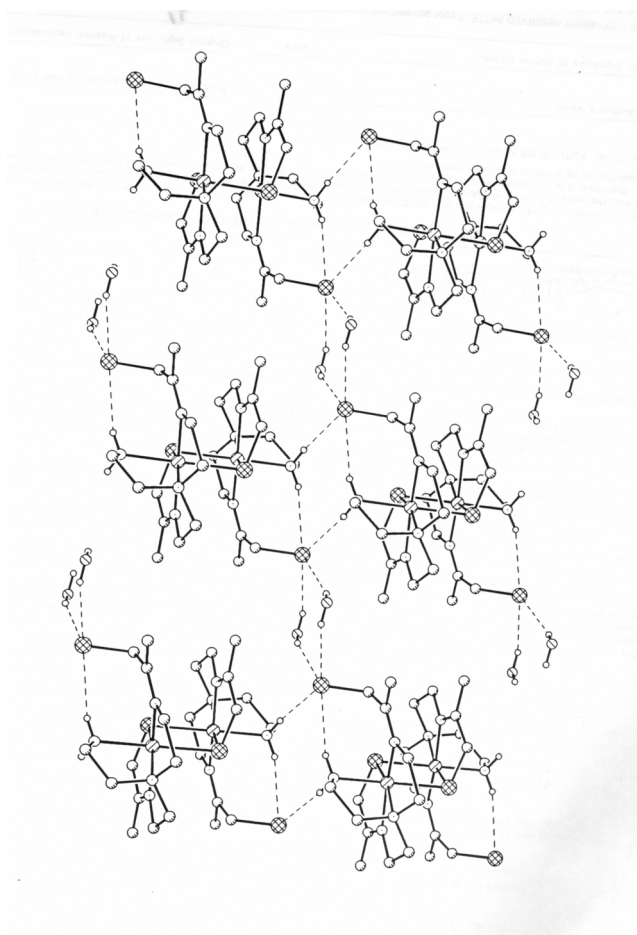

Figure S-2.

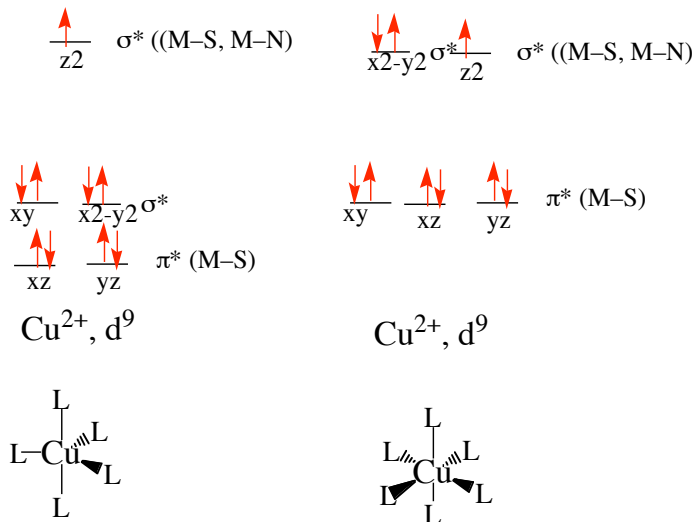

one can see that the predicted increase in M-L bond length upon occupation of  $\sigma^*$  does not occur if the  $Cu^{2+}$  is in tbp geometry

shannon radii are based on this geometry

**Figure S-3.**

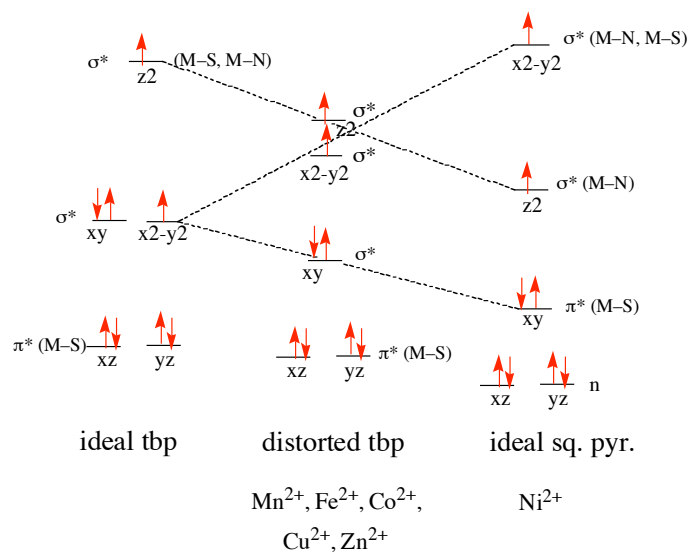

**Figure S-4.**

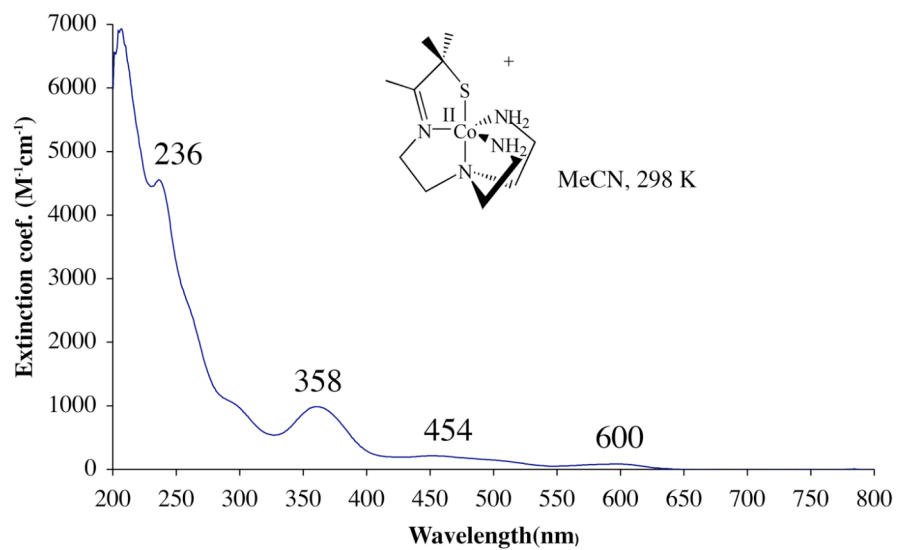

**Figure S-5.**

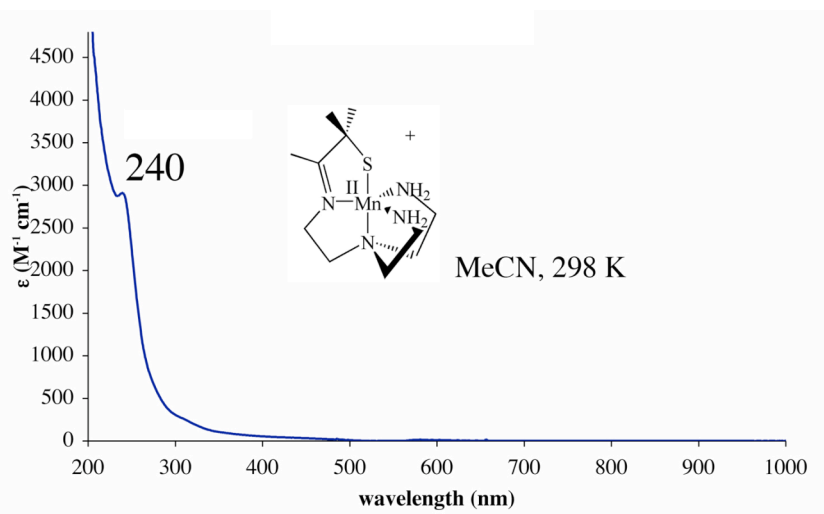

**Figure S-6.**

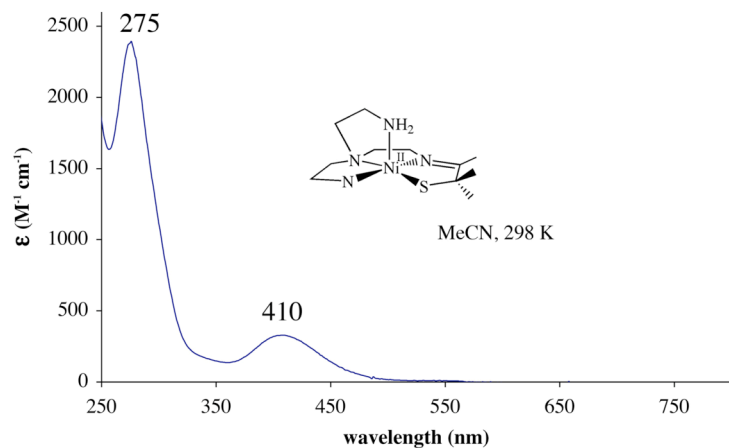

**Figure S-7.**

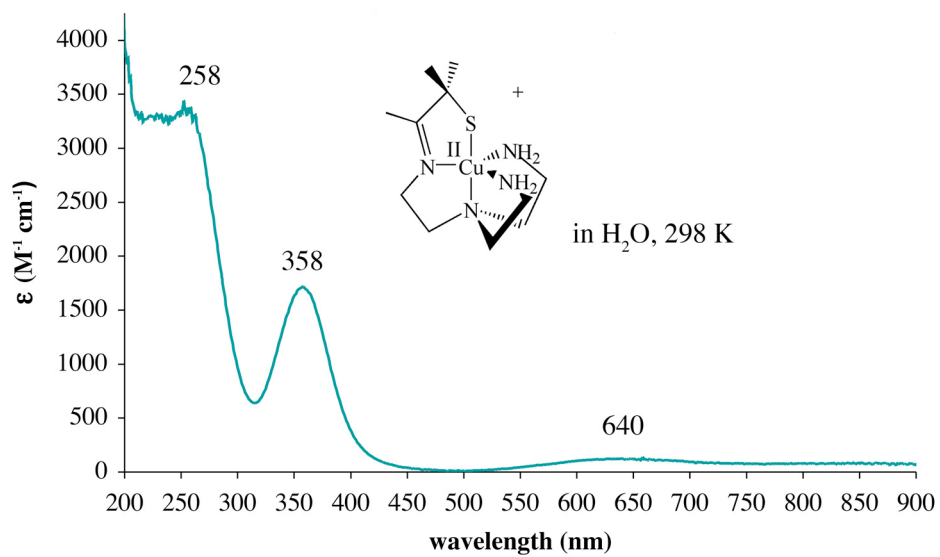

**Figure S-8**



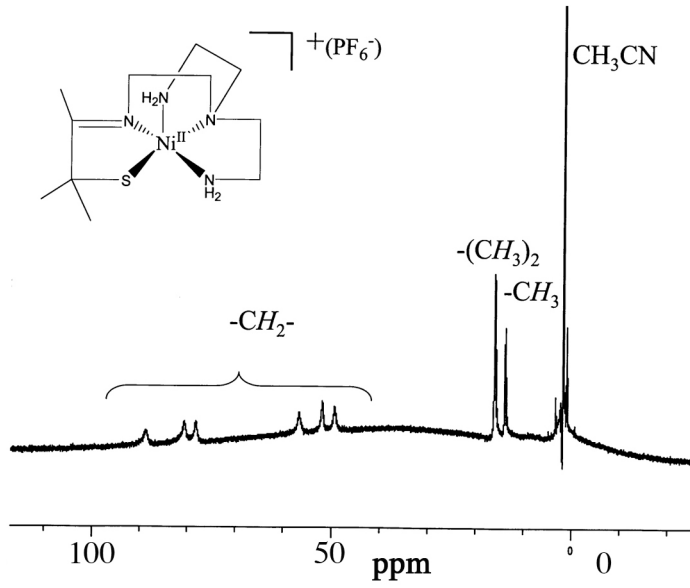

Figure S-9.

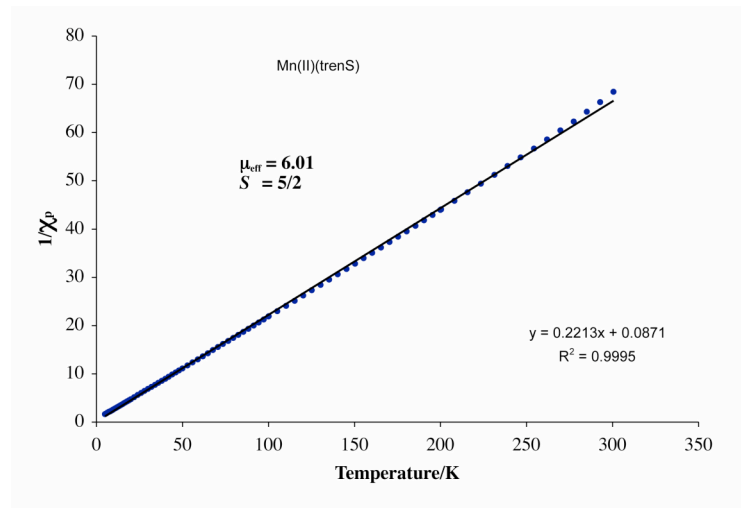

Figure S-10.

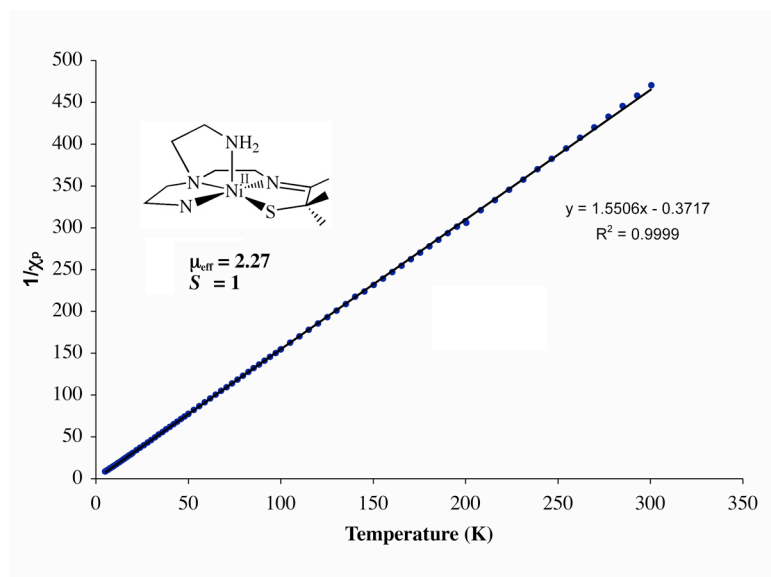

**Figure S-11.**

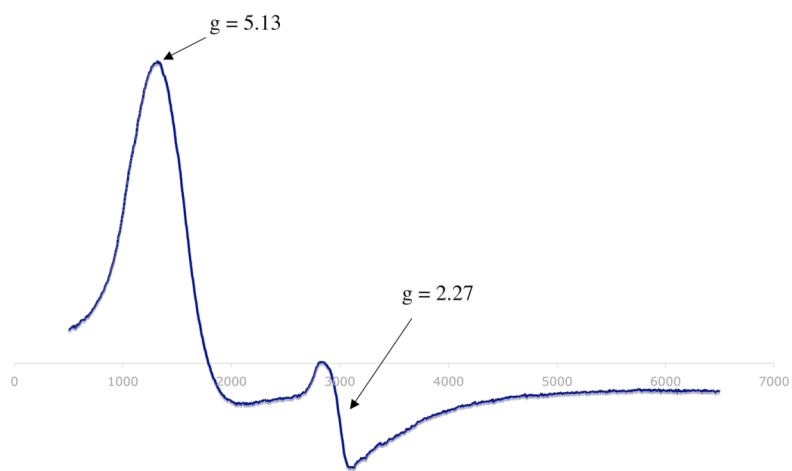

**Figure S-12.**

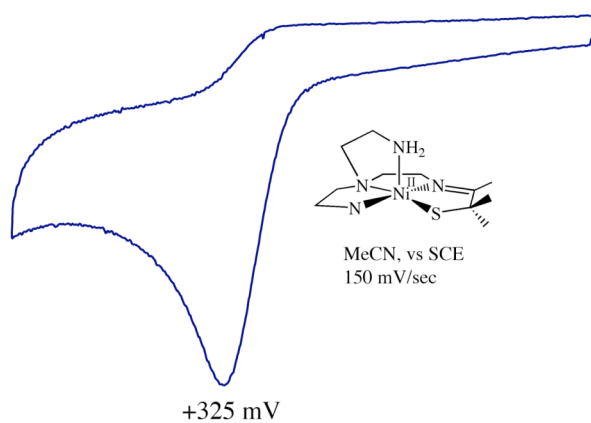

**Figure S-13.**

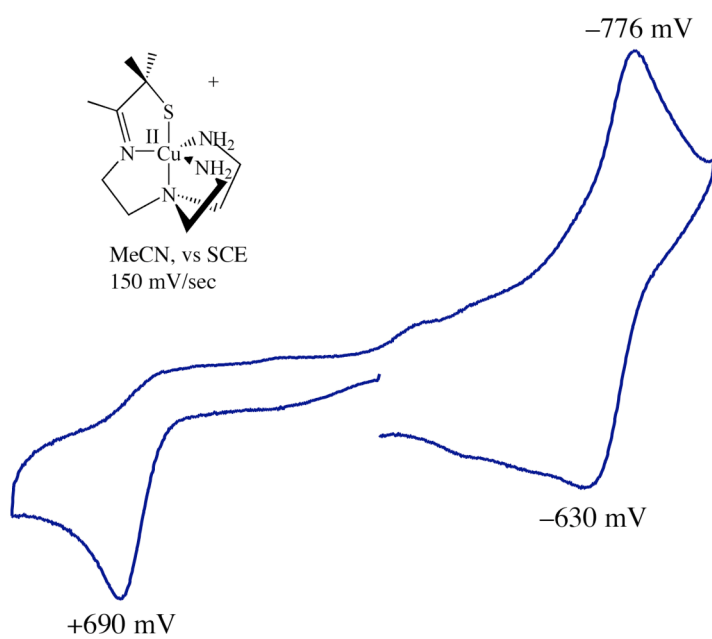

**Figure S-14.**

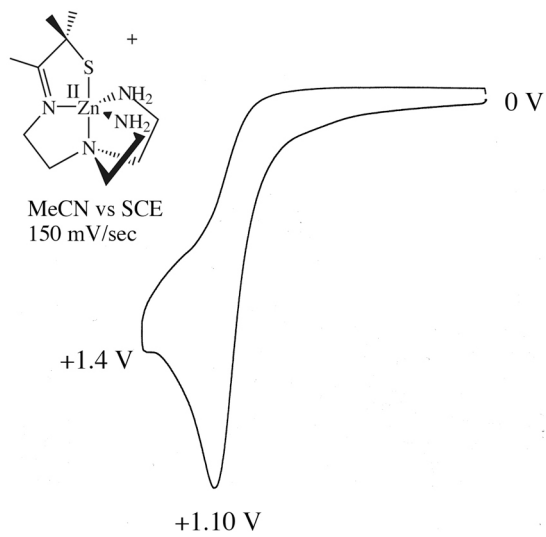

**Figure S-15.**

**Table S-1.** Crystal Data for  $[\text{Ni}^{\text{II}}(\text{SN}_4(\text{tren})\text{-RS}^{\text{dang}})]_2 \cdot 2\text{H}_2\text{O}$  (**3**)

| <b>3</b>                                   |                                                                           |
|--------------------------------------------|---------------------------------------------------------------------------|
| formula                                    | $\text{Ni}_2\text{S}_4\text{N}_8\text{C}_{24}\text{H}_{52}\text{O}_{2.5}$ |
| fw                                         | 738.4                                                                     |
| unit cell <sup>a</sup>                     | triclinic                                                                 |
| a, Å                                       | 8.936(2)                                                                  |
| b, Å                                       | 10.152(2)                                                                 |
| c, Å                                       | 10.458(2)                                                                 |
| $\alpha$ , deg                             | 61.71(3)                                                                  |
| $\beta$ , deg                              | 81.80(3)                                                                  |
| $\gamma$ , deg                             | 87.39(3)                                                                  |
| V, Å <sup>3</sup>                          | 826.2(4)                                                                  |
| Z                                          | 1                                                                         |
| $\sigma_{\text{calc}}$ , g/cm <sup>3</sup> | 1.484                                                                     |
| space group                                | P1                                                                        |
| $\mu$ , cm <sup>-1</sup>                   | 14.30                                                                     |
| transmission factors                       | 1.000 - .9083 <sup>b</sup>                                                |
| R <sup>c</sup>                             | 0.0470                                                                    |
| R <sub>w</sub>                             | 0.0675                                                                    |
| GOF                                        | 1.22                                                                      |

<sup>a</sup> In all cases: Mo K $\alpha$  ( $\lambda=0.71073$  Å) radiation; graphite monochromator; 295 K.

<sup>b</sup> An empirical absorption correction was applied.

<sup>c</sup>  $R = \sum ||F_o| - |F_c|| / \sum |F_o|$ ;  $R_w = [\sum w (|F_o| - |F_c|)^2 / \sum w F_o^2]^{1/2}$ , where  $w^{-1} = \sigma^2(F) + C F^2$  (C=0.0063).

**Table S–2.** Selected Positional Parameters ( $\times 10^4$ ) for  
[Ni<sup>II</sup>(SN<sub>4</sub>(tren)–RS<sup>dang</sup>)]<sub>2</sub> • 2H<sub>2</sub>O (3)

| Atom  | x        | y        | z        |
|-------|----------|----------|----------|
| Ni(1) | 8389(1)  | -4584(1) | 15987(1) |
| S(1)  | 8826(1)  | -5537(1) | 14226(1) |
| S(2)  | 5297(1)  | -1702(1) | 12773(1) |
| N(1)  | 8648(3)  | -6820(3) | 17437(3) |
| N(2)  | 7958(3)  | -4417(3) | 17951(3) |
| N(3)  | 7971(3)  | -2185(3) | 15095(3) |
| N(4)  | 6005(3)  | -4643(3) | 16176(3) |
| O(1)  | 4876(6)  | 1801(5)  | 10299(5) |
| O(2)  | 2433(21) | 3539(22) | 9101(20) |
| C(1)  | 8440(4)  | -7452(4) | 15546(4) |
| C(2)  | 8576(3)  | -7867(3) | 17096(3) |
| C(3)  | 8572(5)  | -9492(4) | 18164(5) |
| C(4)  | 8634(5)  | -7157(4) | 18960(4) |
| C(5)  | 8844(5)  | -5707(4) | 19014(4) |
| C(6)  | 8555(5)  | -3007(4) | 17631(4) |
| C(7)  | 7968(5)  | -1708(4) | 16220(4) |
| C(8)  | 7559(4)  | -1188(4) | 13857(4) |
| C(9)  | 7356(4)  | -1626(4) | 12731(4) |
| C(10) | 7205(6)  | 439(5)   | 13468(6) |
| C(11) | 6300(4)  | -4490(4) | 18395(4) |
| C(12) | 5331(4)  | -3968(5) | 17127(5) |

**Table S-3.** Selected Bond Distances (Å) and Angles (deg) for  
 $[\text{Ni}^{\text{II}}(\text{SN}_4(\text{tren})-\text{RS}^{\text{dang}})]_2 \cdot 2\text{H}_2\text{O}$  (**3**).

|                  |          |                                |          |
|------------------|----------|--------------------------------|----------|
| Ni(1)-S(1)       | 2.434(1) | N(1)-C(2)                      | 1.278(5) |
| Ni(1)-S(1a)      | 2.470(1) | N(1)-C(4)                      | 1.459(5) |
| Ni(1)-N(1)       | 2.073(2) | N(3)-C(8)                      | 1.303(4) |
| Ni(1)-N(2)       | 2.119(3) | N(3)-C(7)                      | 1.469(6) |
| Ni(1)-N(3)       | 2.192(3) | S(1)-C(1)                      | 1.786(3) |
| Ni(1)-N(4)       | 2.112(3) | S(2)-C(9)                      | 1.838(4) |
| S(2) . . . O(1)  | 3.304    | S(2) . . . H(4)                | 2.673    |
| S(2) . . . O(1)* | 3.287    | S(2) . . . H(4)'               | 2.645    |
| S(2) . . . N(4)  | 3.518    | S(2) . . . H(1)*               | 2.524    |
| S(2) . . . N(4)' | 3.534    | S(2) . . . H(2)                | 2.504    |
|                  |          | Ni . . . Ni                    | 3.606    |
| S(1)-Ni(1)-N(1)  | 81.4(1)  | S(2)-H(2)-O(1)                 | 159.1    |
| N(1)-Ni(1)-N(2)  | 82.4(1)  | S(2)-H(4)-N(4)                 | 156.7    |
| N(2)-Ni(1)-N(3)  | 79.7(1)  | S(2)-H(4)' <sup>-</sup> -N(4)' | 169.8    |
| N(3)-Ni(1)-S(1)  | 116.4(1) | S(2)-H(1)* <sup>-</sup> -O(1)* | 154.7    |
| S(1)-Ni(1)-N(2)  | 163.6(1) |                                |          |
| N(1)-Ni(1)-N(3)  | 162.1(1) |                                |          |
| N(4)-Ni(1)-N(3)  | 80.6(1)  | S(1a)-Ni(1)-S(1)               | 85.4(1)  |
| N(4)-Ni(1)-N(2)  | 83.3(1)  | S(1a)-Ni(1)-N(1)               | 83.7(1)  |
| N(4)-Ni(1)-N(1)  | 97.2(1)  | S(1a)-Ni(1)-N(2)               | 95.9(1)  |
| N(4)-Ni(1)-S(1)  | 95.7(1)  | S(1a)-Ni(1)-N(3)               | 98.3(1)  |
| N(4)-Ni(1)-S(1a) | 178.7(1) |                                |          |
| N(3)-C(8)-C(9)   | 119.4(3) | N(1)-C(2)-C(1)                 | 118.5(3) |
| C(8)-C(9)-S(2)   | 104.9(3) | C(2)-C(1)-S(1)                 | 116.4(3) |

Symmetry codes: ' = 1-x, -1-y, 3-z  
 \* = 1-x, -y, 2-z  
 a = 2-x, -1-y, 3-z

**Table S-4.** Intramolecular and Intermolecular S...H contacts (Å)<sup>a</sup> and X-H-S angles (deg) for [Ni<sup>II</sup>(SN<sub>4</sub>(tren)-RS<sup>dang</sup>)]<sub>2</sub> • 2H<sub>2</sub>O (**3**)

|               |       |                  |       |
|---------------|-------|------------------|-------|
| S(2)...H(4A)  | 2.673 | S(2)-H(4)-N(4)   | 156.7 |
| S(2)...H(4D)' | 2.645 | S(2)-H(4)'-N(4)' | 169.8 |
| S(2)...H(1)*  | 2.524 | S(2)-H(1)*-O(1)* | 154.7 |
| S(2)...H(2)   | 2.504 | S(2)-H(2)-O(1)   | 159.1 |
|               |       |                  |       |
| S(2)...N(4)   | 3.518 |                  |       |
| S(2)...N(4)'  | 3.534 |                  |       |
| S(2)...O(1)*  | 3.287 |                  |       |
| S(2)...O(1)   | 3.304 |                  |       |

Symmetry codes:        ' = 1-x, -1-y, 3-z  
                              \* = 1-x, -y, 2-z

<sup>a</sup> H(1) and H(2) are attached to two different interstitial water molecules, H(4) is attached to the apical nitrogen N(4), and H(4) is attached to apical N(4') from an adjacent unit cell. The hydrogen atoms of the H<sub>2</sub>O molecules were located using a difference map, and then refined using a riding model, with O-H(1) of 0.824 Å and O-H(2) of 0.842 Å. Amine hydrogens were placed at calculated positions with N-H of 0.900 Å.



**Table S-5.** Crystal data and structure refinement for  $[\text{Ni}^{\text{II}}(\text{S}^{\text{Me}_2}\text{N}_4(\text{tren}))]\text{Cl}$  (**4**).

|                                   |                                                                                                                         |
|-----------------------------------|-------------------------------------------------------------------------------------------------------------------------|
| Empirical formula                 | C11 H25 Cl N4 Ni S                                                                                                      |
| Formula weight                    | 339.57                                                                                                                  |
| Temperature                       | 161(2) K                                                                                                                |
| Wavelength                        | 0.71070 Å                                                                                                               |
| Crystal system, space group       | Monoclinic, C 2/c (No. 15)                                                                                              |
| Unit cell dimensions              | a = 19.1240(3) Å    alpha = 90 deg.<br>b = 7.7534(3) Å    beta = 100.139(2) deg.<br>c = 21.3505(7) Å    gamma = 90 deg. |
| Volume                            | 3116.33(17) Å <sup>3</sup>                                                                                              |
| Z, Calculated density             | 8, 1.448 Mg/m <sup>3</sup>                                                                                              |
| Reflections used for indexing     | 904                                                                                                                     |
| Absorption coefficient            | 1.540 mm <sup>-1</sup>                                                                                                  |
| F(000)                            | 1440                                                                                                                    |
| Crystal description / color       | purple / plate                                                                                                          |
| Crystal size                      | 0.23 x 0.16 x 0.08 mm                                                                                                   |
| Theta range for data collection   | 2.64 to 28.68 deg.                                                                                                      |
| Index ranges                      | -22<=h<=22, -9<=k<=9, -26<=l<=26                                                                                        |
| Reflections collected / unique    | 52638 / 3519 [R(int) = 0.065]                                                                                           |
| Completeness to 2theta = 28.68    | 40.8%                                                                                                                   |
| Absorption correction             | Empirical (SORTAV)                                                                                                      |
| Max. and min. transmission        | 0.888 and 0.868                                                                                                         |
| Refinement method                 | Full-matrix least-squares on F <sup>2</sup>                                                                             |
| Data / restraints / parameters    | 3519 / 0 / 163                                                                                                          |
| Goodness-of-fit on F <sup>2</sup> | 0.789                                                                                                                   |
| Final R indices [I>4sigma(I)]     | *R1 = 0.0420, wR2 = 0.0996                                                                                              |
| R indices (all data)              | R1 = 0.0716, *wR2 = 0.1221                                                                                              |
| *Report these R factors           |                                                                                                                         |
| Largest diff. peak and hole       | 0.574 and -0.636 e.Å <sup>-3</sup>                                                                                      |

**Table S-6.** Atomic coordinates ( $\times 10^4$ ) and equivalent isotropic displacement parameters ( $\text{\AA}^2 \times 10^3$ ) for  $[\text{Ni}^{\text{II}}(\text{S}^{\text{Me}_2}\text{N}_4(\text{tren}))]\text{Cl}$  (**4**). U(eq) is defined as one third of the trace of the orthogonalized  $U_{ij}$  tensor.

|        | x        | y         | z        | U (eq) |
|--------|----------|-----------|----------|--------|
| C (1)  | 9500 (2) | 977 (6)   | 6779 (2) | 40 (1) |
| C (2)  | 9570 (2) | 194 (5)   | 5656 (2) | 36 (1) |
| C (3)  | 9072 (2) | 318 (5)   | 6143 (2) | 29 (1) |
| C (4)  | 8797 (2) | -1509 (5) | 6241 (2) | 29 (1) |
| C (5)  | 9311 (2) | -2903 (6) | 6493 (2) | 41 (1) |
| C (6)  | 7790 (2) | -3426 (5) | 6191 (2) | 36 (1) |
| C (7)  | 7028 (2) | -3386 (5) | 5813 (2) | 35 (1) |
| C (8)  | 6813 (2) | -1274 (7) | 7079 (2) | 55 (1) |
| C (9)  | 6328 (2) | -1806 (6) | 6494 (2) | 40 (1) |
| C (10) | 6149 (2) | -1194 (5) | 5360 (2) | 37 (1) |
| C (11) | 5938 (2) | 696 (5)   | 5415 (2) | 39 (1) |
| Cl (1) | 8666 (1) | -1382 (1) | 8024 (1) | 39 (1) |
| N (1)  | 8118 (1) | -1759 (4) | 6125 (1) | 28 (1) |
| N (2)  | 6659 (1) | -1748 (4) | 5918 (2) | 32 (1) |
| N (4)  | 7272 (2) | 173 (4)   | 6962 (1) | 30 (1) |
| N (3)  | 6576 (1) | 1738 (4)  | 5640 (2) | 31 (1) |
| Ni (1) | 7430 (1) | 204 (1)   | 6038 (1) | 25 (1) |
| S (1)  | 8352 (1) | 1828 (1)  | 5854 (1) | 30 (1) |

**Table S-7.** Bond lengths [Å] and angles [deg] for  $[\text{Ni}^{\text{II}}(\text{S}^{\text{Me}_2}\text{N}_4(\text{tren}))]\text{Cl}$  (**4**).

|                  |            |
|------------------|------------|
| C(1)-C(3)        | 1.544(5)   |
| C(2)-C(3)        | 1.534(5)   |
| C(3)-C(4)        | 1.538(5)   |
| C(3)-S(1)        | 1.830(3)   |
| C(4)-N(1)        | 1.292(4)   |
| C(4)-C(5)        | 1.496(5)   |
| C(6)-N(1)        | 1.454(5)   |
| C(6)-C(7)        | 1.537(5)   |
| C(7)-N(2)        | 1.489(5)   |
| C(8)-N(4)        | 1.474(5)   |
| C(8)-C(9)        | 1.476(6)   |
| C(9)-N(2)        | 1.480(4)   |
| C(10)-N(2)       | 1.465(5)   |
| C(10)-C(11)      | 1.530(6)   |
| C(11)-N(3)       | 1.471(4)   |
| N(1)-Ni(1)       | 2.000(3)   |
| N(2)-Ni(1)       | 2.097(3)   |
| N(4)-Ni(1)       | 2.048(3)   |
| N(3)-Ni(1)       | 2.077(3)   |
| Ni(1)-S(1)       | 2.2560(9)  |
|                  |            |
| C(2)-C(3)-C(4)   | 107.6(3)   |
| C(2)-C(3)-C(1)   | 108.7(3)   |
| C(4)-C(3)-C(1)   | 109.0(3)   |
| C(2)-C(3)-S(1)   | 109.4(2)   |
| C(4)-C(3)-S(1)   | 112.3(2)   |
| C(1)-C(3)-S(1)   | 109.6(3)   |
| N(1)-C(4)-C(5)   | 122.3(3)   |
| N(1)-C(4)-C(3)   | 117.9(3)   |
| C(5)-C(4)-C(3)   | 119.7(3)   |
| N(1)-C(6)-C(7)   | 108.5(3)   |
| N(2)-C(7)-C(6)   | 111.6(3)   |
| N(4)-C(8)-C(9)   | 112.0(4)   |
| C(8)-C(9)-N(2)   | 113.4(3)   |
| N(2)-C(10)-C(11) | 111.4(3)   |
| N(3)-C(11)-C(10) | 109.7(3)   |
| C(4)-N(1)-C(6)   | 123.4(3)   |
| C(4)-N(1)-Ni(1)  | 121.8(3)   |
| C(6)-N(1)-Ni(1)  | 113.41(19) |
| C(10)-N(2)-C(9)  | 111.3(3)   |
| C(10)-N(2)-C(7)  | 113.2(3)   |
| C(9)-N(2)-C(7)   | 112.5(3)   |
| C(10)-N(2)-Ni(1) | 103.9(2)   |
| C(9)-N(2)-Ni(1)  | 108.3(2)   |
| C(7)-N(2)-Ni(1)  | 106.99(19) |
| C(8)-N(4)-Ni(1)  | 111.4(2)   |
| C(11)-N(3)-Ni(1) | 111.5(2)   |
| N(1)-Ni(1)-N(4)  | 96.16(12)  |
| N(1)-Ni(1)-N(3)  | 158.67(12) |
| N(3)-Ni(1)-N(4)  | 99.31(12)  |
| N(1)-Ni(1)-N(2)  | 84.22(11)  |
| N(4)-Ni(1)-N(2)  | 83.66(12)  |
| N(3)-Ni(1)-N(2)  | 83.00(12)  |
| N(1)-Ni(1)-S(1)  | 85.37(8)   |
| N(4)-Ni(1)-S(1)  | 115.22(8)  |

|                      |            |
|----------------------|------------|
| N (3) -Ni (1) -S (1) | 101.04 (8) |
| N (2) -Ni (1) -S (1) | 159.34 (9) |
| C (3) -S (1) -Ni (1) | 98.56 (11) |

---

**Table S-8.** Anisotropic displacement parameters ( $\text{\AA}^2 \times 10^3$ ) for  
 $[\text{Ni}^{\text{II}}(\text{S}^{\text{Me}_2}\text{N}_4(\text{tren}))]\text{Cl}$  (**4**).  
The anisotropic displacement factor exponent takes the form:  
 $-2 \pi^2 [ h^2 a^{*2} U_{11} + \dots + 2 h k a^* b^* U_{12} ]$

|        | U11    | U22    | U33    | U23    | U13    | U12     |
|--------|--------|--------|--------|--------|--------|---------|
| C (1)  | 36 (2) | 50 (3) | 32 (2) | -6 (2) | 1 (2)  | -1 (2)  |
| C (2)  | 32 (2) | 39 (2) | 39 (2) | 2 (2)  | 10 (1) | 4 (2)   |
| C (3)  | 20 (1) | 37 (2) | 32 (2) | 3 (2)  | 6 (1)  | 0 (1)   |
| C (4)  | 32 (2) | 34 (2) | 20 (2) | -3 (2) | 2 (1)  | 6 (2)   |
| C (5)  | 42 (2) | 43 (2) | 39 (2) | 6 (2)  | 10 (2) | 11 (2)  |
| C (6)  | 40 (2) | 29 (2) | 43 (2) | 1 (2)  | 16 (2) | 5 (2)   |
| C (7)  | 45 (2) | 24 (2) | 37 (2) | -6 (2) | 7 (2)  | -4 (2)  |
| C (8)  | 63 (3) | 58 (3) | 48 (3) | -6 (2) | 18 (2) | -24 (2) |
| C (9)  | 48 (2) | 49 (3) | 27 (2) | -1 (2) | 15 (2) | -20 (2) |
| C (10) | 29 (2) | 41 (2) | 38 (2) | -4 (2) | 0 (2)  | -9 (2)  |
| C (11) | 28 (2) | 41 (2) | 47 (2) | 10 (2) | 2 (2)  | -2 (2)  |
| Cl (1) | 38 (1) | 40 (1) | 38 (1) | 3 (1)  | 6 (1)  | -11 (1) |
| N (1)  | 26 (1) | 25 (2) | 35 (2) | -4 (1) | 10 (1) | 0 (1)   |
| N (2)  | 32 (1) | 29 (2) | 35 (2) | -9 (1) | 9 (1)  | -8 (1)  |
| N (4)  | 37 (2) | 24 (2) | 26 (2) | -2 (1) | 4 (1)  | -1 (1)  |
| N (3)  | 27 (1) | 26 (2) | 39 (2) | 2 (1)  | 4 (1)  | 1 (1)   |
| Ni (1) | 24 (1) | 23 (1) | 27 (1) | 1 (1)  | 5 (1)  | -1 (1)  |
| S (1)  | 25 (1) | 28 (1) | 37 (1) | 4 (1)  | 5 (1)  | -2 (1)  |

**Table S-9.** Hydrogen coordinates (  $\times 10^4$ ) and isotropic displacement parameters ( $\text{\AA}^2 \times 10^3$ ) for  $[\text{Ni}^{\text{II}}(\text{S}^{\text{Me}_2}\text{N}_4(\text{tren}))]\text{Cl}$  (**4**).

|        | x    | y     | z    | U(eq) |
|--------|------|-------|------|-------|
| H(1A)  | 9902 | 88    | 6906 | 60    |
| H(1B)  | 9170 | 903   | 7119 | 60    |
| H(1C)  | 9594 | 2352  | 6737 | 60    |
| H(2A)  | 9949 | -499  | 5785 | 54    |
| H(2B)  | 9318 | -274  | 5234 | 54    |
| H(2C)  | 9653 | 1152  | 5576 | 54    |
| H(5A)  | 9748 | -2496 | 6515 | 62    |
| H(5B)  | 9225 | -3870 | 6272 | 62    |
| H(5C)  | 9299 | -2895 | 6983 | 62    |
| H(6A)  | 7828 | -3589 | 6568 | 40    |
| H(6B)  | 8000 | -4442 | 5974 | 40    |
| H(7A)  | 7029 | -3285 | 5468 | 39    |
| H(7B)  | 6797 | -4662 | 5934 | 39    |
| H(8A)  | 6553 | -1045 | 7494 | 61    |
| H(8B)  | 7230 | -2406 | 7270 | 61    |
| H(9A)  | 5933 | -669  | 6423 | 44    |
| H(9B)  | 6063 | -2840 | 6527 | 44    |
| H(10A) | 5699 | -1909 | 5295 | 40    |
| H(10B) | 6401 | -1272 | 4937 | 40    |
| H(11A) | 5695 | 629   | 5741 | 43    |
| H(11B) | 5673 | 1229  | 4970 | 43    |
| H(3A)  | 7687 | 301   | 7233 | 35    |
| H(3B)  | 7062 | 1218  | 7080 | 35    |
| H(4A)  | 6558 | 2581  | 5950 | 32    |
| H(4B)  | 6648 | 2491  | 5292 | 32    |

**Table S-10.** Crystal data and structure refinement for  $[\text{Mn}^{\text{II}}(\text{S}^{\text{Me}_2}\text{N}_4(\text{tren}))](\text{PF}_6)$  (5)

|                                                                                               |                                                                                                  |
|-----------------------------------------------------------------------------------------------|--------------------------------------------------------------------------------------------------|
| Empirical formula                                                                             | C11 H25 F6 Mn N4 P S                                                                             |
| Formula weight                                                                                | 445.32                                                                                           |
| Temperature                                                                                   | 130(2) K                                                                                         |
| Wavelength                                                                                    | 0.71073 Å                                                                                        |
| Crystal description/color                                                                     | needle / colorless                                                                               |
| Crystal system, space group                                                                   | Orthorhombic, P 21 21 21                                                                         |
| Unit cell dimensions                                                                          | a = 8.194(4)Å alpha = 90 deg.<br>b = 12.831(5)Å beta = 90 deg.<br>c = 18.198(8)Å gamma = 90 deg. |
| Volume                                                                                        | 1913.3(14) Å <sup>3</sup>                                                                        |
| Z, Calculated density                                                                         | 4, 1.546 Mg/m <sup>3</sup>                                                                       |
| Absorption coefficient                                                                        | 0.939 mm <sup>-1</sup>                                                                           |
| F(000)                                                                                        | 916                                                                                              |
| Crystal size                                                                                  | 0.59 x 0.26 x 0.26 mm                                                                            |
| Reflections for indexing                                                                      | 915                                                                                              |
| Theta range for data collection                                                               | 2.24 to 25.32 deg.                                                                               |
| Index ranges                                                                                  | -8<=h<=9, -15<=k<=15, -21<=l<=21                                                                 |
| Reflections collected / unique                                                                | 2733 / 2733 [R(int) = 0.0658]                                                                    |
| Completeness to theta = 25.00                                                                 | 86.5%                                                                                            |
| Absorption correction                                                                         | Semi-empirical from equivalents                                                                  |
| Max. and min. transmission                                                                    | 0.7923 and 0.6073                                                                                |
| Refinement method                                                                             | Full-matrix least-squares on F <sup>2</sup>                                                      |
| Data / restraints / parameters                                                                | 2733 / 0 / 220                                                                                   |
| Goodness-of-fit on F <sup>2</sup>                                                             | S = 1.036                                                                                        |
| S = root(sum(w*D*D)/(n-p)), where D = (Fo*Fo - Fc*Fc)                                         |                                                                                                  |
| Final R indices [I>2sigma(I)]                                                                 | *R1 = 0.0583, wR2 = 0.1199                                                                       |
| R indices (all data)                                                                          | R1 = 0.1571, *wR2 = 0.1592                                                                       |
| *Report these R factors.                                                                      |                                                                                                  |
| R1 = sum  Fo - Fc  /sum Fo , wR2= root(sum(w*D*D)/sum(w*Fo*Fo)),<br>where D = (Fo*Fo - Fc*Fc) |                                                                                                  |
| Weighting scheme                                                                              |                                                                                                  |
| calc w=1/[\s^2^(Fo^2^)+(0.0700P)^2^+0.2820P] where P=(Fo^2^+2Fc^2^)/3                         |                                                                                                  |
| Absolute structure parameter                                                                  | 0.04(6)                                                                                          |
| Largest diff. peak and hole                                                                   | 0.360 and -0.335 e.Å <sup>-3</sup>                                                               |

**Table S-11.** Atomic coordinates ( $\times 10^4$ ) and equivalent isotropic displacement parameters ( $\text{\AA}^2 \times 10^3$ ) for  $[\text{Mn}^{\text{II}}(\text{S}^{\text{Me}_2}\text{N}_4(\text{tren}))](\text{PF}_6)$  (**5**).  $U(\text{eq})$  is defined as one third of the trace of the orthogonalized  $U_{ij}$  tensor.

|       | x         | y         | z        | U(eq) |
|-------|-----------|-----------|----------|-------|
| Mn(1) | 9244(2)   | 1032(1)   | 120(1)   | 65(1) |
| S(1)  | 9224(3)   | 2451(2)   | -750(1)  | 70(1) |
| P(1)  | 5390(3)   | -965(3)   | -1566(1) | 73(1) |
| F(1)  | 6157(7)   | -893(6)   | -2379(2) | 79(2) |
| F(2)  | 6687(7)   | -134(5)   | -1274(3) | 79(2) |
| F(3)  | 4634(7)   | -1029(6)  | -757(3)  | 91(2) |
| F(4)  | 4086(7)   | -1805(5)  | -1855(3) | 87(2) |
| F(5)  | 4149(8)   | -36(5)    | -1776(3) | 88(2) |
| F(6)  | 6615(7)   | -1903(6)  | -1359(3) | 90(2) |
| N(1)  | 10200(9)  | 195(8)    | -820(4)  | 63(3) |
| N(2)  | 9618(9)   | -651(6)   | 576(4)   | 55(2) |
| N(3)  | 10596(11) | 1339(7)   | 1142(4)  | 77(3) |
| N(4)  | 6719(10)  | 535(7)    | 330(4)   | 68(3) |
| C(1)  | 11596(12) | 2200(10)  | -1812(6) | 86(4) |
| C(2)  | 8684(13)  | 1986(10)  | -2181(5) | 84(4) |
| C(3)  | 9971(13)  | 1770(10)  | -1567(5) | 69(3) |
| C(4)  | 10159(12) | 582(10)   | -1478(5) | 63(3) |
| C(5)  | 10282(12) | -71(10)   | -2166(5) | 81(4) |
| C(6)  | 10404(11) | -946(9)   | -724(4)  | 68(3) |
| C(7)  | 10767(12) | -1182(9)  | 58(4)    | 69(3) |
| C(8)  | 10332(14) | -544(9)   | 1316(6)  | 73(3) |
| C(9)  | 11461(13) | 409(10)   | 1347(6)  | 74(3) |
| C(10) | 8053(12)  | -1162(10) | 590(6)   | 74(3) |
| C(11) | 6716(12)  | -406(8)   | 836(5)   | 59(3) |



**Table S-12.** Bond lengths [Å] and angles [deg] for  $[\text{Mn}^{\text{II}}(\text{S}^{\text{Me}_2}\text{N}_4(\text{tren}))](\text{PF}_6)$  (**5**).

|                 |           |
|-----------------|-----------|
| Mn(1)-N(1)      | 2.166(8)  |
| Mn(1)-N(3)      | 2.201(8)  |
| Mn(1)-N(4)      | 2.198(8)  |
| Mn(1)-N(2)      | 2.334(8)  |
| Mn(1)-S(1)      | 2.412(3)  |
| S(1)-C(3)       | 1.831(11) |
| P(1)-F(2)       | 1.597(7)  |
| P(1)-F(4)       | 1.606(7)  |
| P(1)-F(3)       | 1.599(6)  |
| P(1)-F(1)       | 1.611(5)  |
| P(1)-F(5)       | 1.613(7)  |
| P(1)-F(6)       | 1.612(7)  |
| N(1)-C(4)       | 1.295(11) |
| N(1)-C(6)       | 1.484(12) |
| N(2)-C(10)      | 1.441(12) |
| N(2)-C(8)       | 1.475(11) |
| N(2)-C(7)       | 1.496(11) |
| N(3)-C(9)       | 1.438(13) |
| N(3)-H(3A)      | 0.9200    |
| N(3)-H(3B)      | 0.9200    |
| N(4)-C(11)      | 1.518(12) |
| N(4)-H(4A)      | 0.9200    |
| N(4)-H(4B)      | 0.9200    |
| C(1)-C(3)       | 1.509(13) |
| C(1)-H(1A)      | 0.9800    |
| C(1)-H(1B)      | 0.9800    |
| C(1)-H(1C)      | 0.9800    |
| C(2)-C(3)       | 1.560(14) |
| C(2)-H(2A)      | 0.9800    |
| C(2)-H(2B)      | 0.9800    |
| C(2)-H(2C)      | 0.9800    |
| C(3)-C(4)       | 1.541(14) |
| C(4)-C(5)       | 1.510(13) |
| C(5)-H(5A)      | 0.9800    |
| C(5)-H(5B)      | 0.9800    |
| C(5)-H(5C)      | 0.9800    |
| C(6)-C(7)       | 1.484(11) |
| C(6)-H(6A)      | 0.9900    |
| C(6)-H(6B)      | 0.9900    |
| C(7)-H(7A)      | 0.9900    |
| C(7)-H(7B)      | 0.9900    |
| C(8)-C(9)       | 1.534(14) |
| C(8)-H(8A)      | 0.9900    |
| C(8)-H(8B)      | 0.9900    |
| C(9)-H(9A)      | 0.9900    |
| C(9)-H(9B)      | 0.9900    |
| C(10)-C(11)     | 1.531(14) |
| C(10)-H(10A)    | 0.9900    |
| C(10)-H(10B)    | 0.9900    |
| C(11)-H(11A)    | 0.9900    |
| C(11)-H(11B)    | 0.9900    |
| N(1)-Mn(1)-N(3) | 125.0(3)  |
| N(1)-Mn(1)-N(4) | 109.5(3)  |

|                       |             |
|-----------------------|-------------|
| N (3) -Mn (1) -N (4)  | 112.2 (3)   |
| N (1) -Mn (1) -N (2)  | 77.0 (3)    |
| N (3) -Mn (1) -N (2)  | 78.4 (3)    |
| N (4) -Mn (1) -N (2)  | 78.1 (3)    |
| N (1) -Mn (1) -S (1)  | 81.9 (3)    |
| N (3) -Mn (1) -S (1)  | 115.0 (3)   |
| N (4) -Mn (1) -S (1)  | 109.1 (2)   |
| N (2) -Mn (1) -S (1)  | 158.85 (19) |
| C (3) -S (1) -Mn (1)  | 99.8 (4)    |
| F (2) -P (1) -F (4)   | 179.7 (4)   |
| F (2) -P (1) -F (3)   | 89.2 (3)    |
| F (4) -P (1) -F (3)   | 90.5 (3)    |
| F (2) -P (1) -F (1)   | 90.4 (3)    |
| F (4) -P (1) -F (1)   | 89.8 (3)    |
| F (3) -P (1) -F (1)   | 179.6 (5)   |
| F (2) -P (1) -F (5)   | 90.3 (4)    |
| F (4) -P (1) -F (5)   | 89.9 (3)    |
| F (3) -P (1) -F (5)   | 90.7 (4)    |
| F (1) -P (1) -F (5)   | 89.1 (3)    |
| F (2) -P (1) -F (6)   | 90.4 (3)    |
| F (4) -P (1) -F (6)   | 89.4 (4)    |
| F (3) -P (1) -F (6)   | 89.3 (4)    |
| F (1) -P (1) -F (6)   | 90.8 (4)    |
| F (5) -P (1) -F (6)   | 179.3 (4)   |
| C (4) -N (1) -C (6)   | 119.4 (9)   |
| C (4) -N (1) -Mn (1)  | 122.0 (8)   |
| C (6) -N (1) -Mn (1)  | 115.9 (6)   |
| C (10) -N (2) -C (8)  | 112.3 (8)   |
| C (10) -N (2) -C (7)  | 111.3 (8)   |
| C (8) -N (2) -C (7)   | 111.6 (7)   |
| C (10) -N (2) -Mn (1) | 108.1 (6)   |
| C (8) -N (2) -Mn (1)  | 106.9 (6)   |
| C (7) -N (2) -Mn (1)  | 106.3 (6)   |
| C (9) -N (3) -Mn (1)  | 108.6 (7)   |
| C (9) -N (3) -H (3A)  | 110.0       |
| Mn (1) -N (3) -H (3A) | 110.0       |
| C (9) -N (3) -H (3B)  | 110.0       |
| Mn (1) -N (3) -H (3B) | 110.0       |
| H (3A) -N (3) -H (3B) | 108.4       |
| C (11) -N (4) -Mn (1) | 109.8 (6)   |
| C (11) -N (4) -H (4A) | 109.7       |
| Mn (1) -N (4) -H (4A) | 109.7       |
| C (11) -N (4) -H (4B) | 109.7       |
| Mn (1) -N (4) -H (4B) | 109.7       |
| H (4A) -N (4) -H (4B) | 108.2       |
| C (3) -C (1) -H (1A)  | 109.5       |
| C (3) -C (1) -H (1B)  | 109.5       |
| H (1A) -C (1) -H (1B) | 109.5       |
| C (3) -C (1) -H (1C)  | 109.5       |
| H (1A) -C (1) -H (1C) | 109.5       |
| H (1B) -C (1) -H (1C) | 109.5       |
| C (3) -C (2) -H (2A)  | 109.5       |
| C (3) -C (2) -H (2B)  | 109.5       |
| H (2A) -C (2) -H (2B) | 109.5       |
| C (3) -C (2) -H (2C)  | 109.5       |
| H (2A) -C (2) -H (2C) | 109.5       |
| H (2B) -C (2) -H (2C) | 109.5       |

|                          |            |
|--------------------------|------------|
| C (1) -C (3) -C (4)      | 107.7 (9)  |
| C (1) -C (3) -C (2)      | 108.7 (9)  |
| C (4) -C (3) -C (2)      | 108.6 (9)  |
| C (1) -C (3) -S (1)      | 111.1 (9)  |
| C (4) -C (3) -S (1)      | 114.8 (7)  |
| C (2) -C (3) -S (1)      | 105.7 (8)  |
| N (1) -C (4) -C (5)      | 123.5 (11) |
| N (1) -C (4) -C (3)      | 118.6 (10) |
| C (5) -C (4) -C (3)      | 117.8 (9)  |
| C (4) -C (5) -H (5A)     | 109.5      |
| C (4) -C (5) -H (5B)     | 109.5      |
| H (5A) -C (5) -H (5B)    | 109.5      |
| C (4) -C (5) -H (5C)     | 109.5      |
| H (5A) -C (5) -H (5C)    | 109.5      |
| H (5B) -C (5) -H (5C)    | 109.5      |
| C (7) -C (6) -N (1)      | 109.7 (8)  |
| C (7) -C (6) -H (6A)     | 109.7      |
| N (1) -C (6) -H (6A)     | 109.7      |
| C (7) -C (6) -H (6B)     | 109.7      |
| N (1) -C (6) -H (6B)     | 109.7      |
| H (6A) -C (6) -H (6B)    | 108.2      |
| C (6) -C (7) -N (2)      | 112.6 (8)  |
| C (6) -C (7) -H (7A)     | 109.1      |
| N (2) -C (7) -H (7A)     | 109.1      |
| C (6) -C (7) -H (7B)     | 109.1      |
| N (2) -C (7) -H (7B)     | 109.1      |
| H (7A) -C (7) -H (7B)    | 107.8      |
| N (2) -C (8) -C (9)      | 110.3 (9)  |
| N (2) -C (8) -H (8A)     | 109.6      |
| C (9) -C (8) -H (8A)     | 109.6      |
| N (2) -C (8) -H (8B)     | 109.6      |
| C (9) -C (8) -H (8B)     | 109.6      |
| H (8A) -C (8) -H (8B)    | 108.1      |
| N (3) -C (9) -C (8)      | 110.8 (9)  |
| N (3) -C (9) -H (9A)     | 109.5      |
| C (8) -C (9) -H (9A)     | 109.5      |
| N (3) -C (9) -H (9B)     | 109.5      |
| C (8) -C (9) -H (9B)     | 109.5      |
| H (9A) -C (9) -H (9B)    | 108.1      |
| N (2) -C (10) -C (11)    | 110.7 (10) |
| N (2) -C (10) -H (10A)   | 109.5      |
| C (11) -C (10) -H (10A)  | 109.5      |
| N (2) -C (10) -H (10B)   | 109.5      |
| C (11) -C (10) -H (10B)  | 109.5      |
| H (10A) -C (10) -H (10B) | 108.1      |
| N (4) -C (11) -C (10)    | 109.0 (8)  |
| N (4) -C (11) -H (11A)   | 109.9      |
| C (10) -C (11) -H (11A)  | 109.9      |
| N (4) -C (11) -H (11B)   | 109.9      |
| C (10) -C (11) -H (11B)  | 109.9      |
| H (11A) -C (11) -H (11B) | 108.3      |

---

Symmetry transformations used to generate equivalent atoms:

**Table S-13.** Anisotropic displacement parameters ( $\text{\AA}^2 \times 10^3$ ) for  $[\text{Mn}^{\text{II}}(\text{S}^{\text{Me}_2}\text{N}_4(\text{tren}))](\text{PF}_6)$  (**5**).

The anisotropic displacement factor exponent takes the form:  
 $-2 \pi^2 [ h^2 a^{*2} U_{11} + \dots + 2 h k a^* b^* U_{12} ]$

|        | U11    | U22      | U33      | U23     | U13     | U12     |
|--------|--------|----------|----------|---------|---------|---------|
| Mn (1) | 65 (1) | 70 (1)   | 60 (1)   | 2 (1)   | -1 (1)  | 3 (1)   |
| S (1)  | 74 (2) | 74 (2)   | 62 (2)   | 2 (1)   | -2 (2)  | -1 (2)  |
| P (1)  | 64 (2) | 89 (3)   | 66 (2)   | -3 (2)  | -6 (1)  | 0 (2)   |
| F (1)  | 81 (4) | 101 (6)  | 56 (3)   | -5 (3)  | -5 (3)  | -1 (4)  |
| F (2)  | 62 (4) | 90 (6)   | 86 (4)   | -16 (4) | -1 (3)  | -6 (4)  |
| F (3)  | 73 (4) | 145 (6)  | 57 (3)   | 0 (4)   | 1 (3)   | -16 (5) |
| F (4)  | 70 (4) | 91 (6)   | 99 (4)   | -7 (4)  | -12 (4) | -27 (4) |
| F (5)  | 71 (4) | 98 (6)   | 95 (4)   | -1 (4)  | -1 (4)  | 18 (4)  |
| F (6)  | 87 (4) | 98 (7)   | 84 (4)   | 6 (4)   | -25 (3) | 5 (4)   |
| N (1)  | 71 (6) | 67 (8)   | 52 (6)   | 2 (4)   | -2 (4)  | -6 (5)  |
| N (2)  | 48 (5) | 69 (8)   | 48 (5)   | -1 (4)  | -8 (4)  | 1 (4)   |
| N (3)  | 86 (7) | 76 (9)   | 68 (5)   | 15 (4)  | -3 (5)  | 5 (7)   |
| N (4)  | 93 (6) | 53 (8)   | 57 (5)   | -5 (4)  | -9 (4)  | -7 (5)  |
| C (1)  | 70 (7) | 69 (11)  | 120 (10) | 18 (7)  | 12 (6)  | 0 (8)   |
| C (2)  | 84 (9) | 89 (11)  | 78 (8)   | -2 (7)  | -3 (6)  | 7 (7)   |
| C (3)  | 72 (8) | 63 (9)   | 72 (8)   | -2 (6)  | -3 (6)  | 10 (7)  |
| C (4)  | 51 (6) | 98 (11)  | 39 (6)   | 1 (6)   | 8 (4)   | 0 (6)   |
| C (5)  | 58 (7) | 132 (14) | 52 (7)   | -6 (7)  | 1 (5)   | -7 (8)  |
| C (6)  | 66 (7) | 91 (10)  | 45 (5)   | 6 (6)   | 4 (4)   | -14 (8) |
| C (7)  | 68 (6) | 89 (9)   | 50 (6)   | -8 (5)  | 4 (5)   | -5 (8)  |
| C (8)  | 86 (8) | 50 (9)   | 84 (8)   | -8 (6)  | -2 (6)  | -4 (7)  |
| C (9)  | 79 (8) | 63 (10)  | 79 (8)   | 12 (7)  | 10 (6)  | -1 (8)  |
| C (10) | 74 (8) | 63 (11)  | 84 (8)   | -1 (6)  | -7 (6)  | -13 (7) |
| C (11) | 59 (6) | 56 (9)   | 63 (6)   | 5 (6)   | 11 (5)  | -2 (6)  |

**Table S-14.** Hydrogen coordinates (  $\times 10^4$ ) and isotropic displacement parameters ( $\text{\AA}^2 \times 10^3$ ) for  $[\text{Mn}^{\text{II}}(\text{S}^{\text{Me}_2}\text{N}_4(\text{tren}))](\text{PF}_6)$  (**5**).

|        | x     | y     | z     | U(eq) |
|--------|-------|-------|-------|-------|
| H(3A)  | 11320 | 1878  | 1072  | 92    |
| H(3B)  | 9883  | 1526  | 1510  | 92    |
| H(4A)  | 6146  | 1072  | 544   | 81    |
| H(4B)  | 6218  | 368   | -107  | 81    |
| H(1A)  | 11914 | 1873  | -2277 | 104   |
| H(1B)  | 12423 | 2050  | -1437 | 104   |
| H(1C)  | 11507 | 2955  | -1880 | 104   |
| H(2A)  | 9024  | 1641  | -2636 | 101   |
| H(2B)  | 8601  | 2739  | -2264 | 101   |
| H(2C)  | 7620  | 1714  | -2027 | 101   |
| H(5A)  | 10474 | 385   | -2590 | 97    |
| H(5B)  | 9261  | -456  | -2238 | 97    |
| H(5C)  | 11189 | -563  | -2118 | 97    |
| H(6A)  | 9392  | -1309 | -874  | 81    |
| H(6B)  | 11307 | -1198 | -1038 | 81    |
| H(7A)  | 11897 | -959  | 170   | 83    |
| H(7B)  | 10702 | -1945 | 135   | 83    |
| H(8A)  | 10959 | -1180 | 1439  | 88    |
| H(8B)  | 9448  | -465  | 1683  | 88    |
| H(9A)  | 11899 | 487   | 1851  | 89    |
| H(9B)  | 12393 | 303   | 1009  | 89    |
| H(10A) | 8095  | -1762 | 932   | 89    |
| H(10B) | 7793  | -1431 | 93    | 89    |
| H(11A) | 5639  | -755  | 816   | 71    |
| H(11B) | 6918  | -182  | 1348  | 71    |

**Table S-15.** Crystal data and structure refinement for  $[\text{Co}^{\text{II}}(\text{S}^{\text{Me}_2}\text{N}_4(\text{tren}))](\text{PF}_6)$  (**6**).

|                                   |                                                                                                         |
|-----------------------------------|---------------------------------------------------------------------------------------------------------|
| Empirical formula                 | C11 H25 Co F6 N4 P S                                                                                    |
| Formula weight                    | 449.31                                                                                                  |
| Temperature                       | 153(2) K                                                                                                |
| Wavelength                        | 0.71070 Å                                                                                               |
| Crystal description/color         | prism / pleochroic red/green                                                                            |
| Crystal system, space group       | Orthorhombic, P 21 21 21                                                                                |
| Unit cell dimensions              | a = 8.1770(6) Å alpha = 90 deg.<br>b = 12.7180(6) Å beta = 90 deg.<br>c = 17.9770(13) Å gamma = 90 deg. |
| Volume                            | 1869.5(2) Å <sup>3</sup>                                                                                |
| Z, Calculated density             | 4, 1.596 Mg/m <sup>3</sup>                                                                              |
| Absorption coefficient            | 1.173 mm <sup>-1</sup>                                                                                  |
| F(000)                            | 924                                                                                                     |
| Crystal size                      | 0.50 x 0.38 x 0.30 mm                                                                                   |
| Reflections for indexing          | 323                                                                                                     |
| Theta range for data collection   | 1.96 to 28.26 deg.                                                                                      |
| Index ranges                      | -6<=h<=10, -10<=k<=12, -22<=l<=22                                                                       |
| Reflections collected / unique    | 5056 / 3241 [R(int) = 0.047]                                                                            |
| Completeness to theta = 28.26     | 77.6%                                                                                                   |
| Absorption correction             | Numerical, SORTAV                                                                                       |
| Max. and min. transmission        | 0.7198 and 0.5916                                                                                       |
| Refinement method                 | Full-matrix least-squares on F <sup>2</sup>                                                             |
| Data / restraints / parameters    | 3241 / 0 / 218                                                                                          |
| Goodness-of-fit on F <sup>2</sup> | 1.093                                                                                                   |
| Final R indices [I>2sigma(I)]     | *R1 = 0.0375, wR2 = 0.0978                                                                              |
| R indices (all data)              | R1 = 0.0413, *wR2 = 0.1030<br>*Report these R factors                                                   |
| Weighting scheme                  | calc w=1/[\s^2^(Fo^2^)+(0.0516P)^2^+2.1891P]<br>where P=(Fo^2^+2Fc^2^)/3                                |
| Absolute structure parameter      | -0.006(19)                                                                                              |
| Extinction coefficient            | 0.0054(17)                                                                                              |
| Largest diff. peak and hole       | 0.487 and -0.488 e.Å <sup>-3</sup>                                                                      |

**Table S-16.** Atomic coordinates ( $\times 10^4$ ) and equivalent isotropic displacement parameters ( $\text{\AA}^2 \times 10^3$ ) for  $[\text{Co}^{\text{II}}(\text{S}^{\text{Me}_2}\text{N}_4(\text{tren}))](\text{PF}_6)$  (**6**).  $U(\text{eq})$  is defined as one third of the trace of the orthogonalized  $U_{ij}$  tensor.

|        | x         | y        | z         | U (eq) |
|--------|-----------|----------|-----------|--------|
| Co (1) | 713 (1)   | 4044 (1) | 9926 (1)  | 11 (1) |
| C (1)  | -1616 (6) | 2754 (4) | 11783 (3) | 33 (1) |
| C (2)  | 1352 (6)  | 2977 (4) | 12142 (2) | 28 (1) |
| C (3)  | 59 (5)    | 3220 (3) | 11550 (2) | 16 (1) |
| C (4)  | -151 (4)  | 4399 (3) | 11467 (2) | 14 (1) |
| C (5)  | -345 (5)  | 5042 (4) | 12178 (2) | 21 (1) |
| C (6)  | -369 (4)  | 5967 (3) | 10754 (2) | 15 (1) |
| C (7)  | -753 (4)  | 6223 (3) | 9946 (2)  | 16 (1) |
| C (8)  | 1988 (4)  | 6156 (4) | 9401 (2)  | 19 (1) |
| C (9)  | 3262 (5)  | 5346 (4) | 9193 (2)  | 18 (1) |
| C (10) | -1510 (5) | 4585 (4) | 8685 (2)  | 21 (1) |
| C (11) | -374 (5)  | 5520 (4) | 8690 (2)  | 21 (1) |
| N (1)  | -159 (3)  | 4831 (3) | 10829 (2) | 11 (1) |
| N (3)  | -620 (4)  | 3657 (3) | 8974 (2)  | 17 (1) |
| N (2)  | 367 (4)   | 5648 (3) | 9436 (2)  | 14 (1) |
| N (4)  | 3134 (3)  | 4443 (3) | 9709 (2)  | 16 (1) |
| F (1)  | 6001 (3)  | 6805 (2) | 11846 (2) | 37 (1) |
| F (2)  | 5846 (3)  | 5044 (2) | 11807 (2) | 35 (1) |
| F (3)  | 3317 (3)  | 5135 (2) | 11324 (1) | 26 (1) |
| F (4)  | 3440 (4)  | 6904 (2) | 11364 (2) | 34 (1) |
| F (5)  | 3888 (3)  | 5961 (2) | 12405 (1) | 28 (1) |
| F (6)  | 5399 (3)  | 5987 (3) | 10760 (1) | 42 (1) |
| S (1)  | 715 (1)   | 2584 (1) | 10678 (1) | 15 (1) |
| P (1)  | 4657 (1)  | 5974 (1) | 11586 (1) | 18 (1) |

**Table S-17.** Bond lengths [Å] and angles [deg] for [Co<sup>II</sup>(S<sup>Me</sup><sub>2</sub>N<sub>4</sub>(tren))](PF<sub>6</sub>) (**6**).

---

|              |            |
|--------------|------------|
| Co(1)-N(1)   | 2.037(3)   |
| Co(1)-N(4)   | 2.081(3)   |
| Co(1)-N(3)   | 2.087(3)   |
| Co(1)-N(2)   | 2.239(3)   |
| Co(1)-S(1)   | 2.2973(11) |
| C(1)-C(3)    | 1.550(6)   |
| C(1)-H(1A)   | 0.9800     |
| C(1)-H(1B)   | 0.9800     |
| C(1)-H(1C)   | 0.9800     |
| C(2)-C(3)    | 1.532(6)   |
| C(2)-H(2A)   | 0.9800     |
| C(2)-H(2B)   | 0.9800     |
| C(2)-H(2C)   | 0.9800     |
| C(3)-C(4)    | 1.517(7)   |
| C(3)-S(1)    | 1.844(4)   |
| C(4)-N(1)    | 1.272(5)   |
| C(4)-C(5)    | 1.525(5)   |
| C(5)-H(5A)   | 0.9800     |
| C(5)-H(5B)   | 0.9800     |
| C(5)-H(5C)   | 0.9800     |
| C(6)-N(1)    | 1.461(6)   |
| C(6)-C(7)    | 1.521(5)   |
| C(6)-H(6A)   | 0.9900     |
| C(6)-H(6B)   | 0.9900     |
| C(7)-N(2)    | 1.487(5)   |
| C(7)-H(7A)   | 0.9900     |
| C(7)-H(7B)   | 0.9900     |
| C(8)-N(2)    | 1.475(5)   |
| C(8)-C(9)    | 1.512(6)   |
| C(8)-H(8A)   | 0.9900     |
| C(8)-H(8B)   | 0.9900     |
| C(9)-N(4)    | 1.480(5)   |
| C(9)-H(9A)   | 0.9900     |
| C(9)-H(9B)   | 0.9900     |
| C(10)-N(3)   | 1.480(5)   |
| C(10)-C(11)  | 1.509(6)   |
| C(10)-H(10A) | 0.9900     |
| C(10)-H(10B) | 0.9900     |
| C(11)-N(2)   | 1.482(4)   |
| C(11)-H(11A) | 0.9900     |
| C(11)-H(11B) | 0.9900     |
| N(3)-H(2D)   | 0.9200     |
| N(3)-H(2E)   | 0.9200     |
| N(4)-H(4A)   | 0.9200     |
| N(4)-H(4B)   | 0.9200     |
| F(1)-P(1)    | 1.594(3)   |
| F(2)-P(1)    | 1.582(3)   |
| F(3)-P(1)    | 1.601(3)   |
| F(4)-P(1)    | 1.596(3)   |
| F(5)-P(1)    | 1.601(2)   |
| F(6)-P(1)    | 1.603(3)   |



|                       |             |
|-----------------------|-------------|
| N (1) -Co (1) -N (4)  | 111.26 (13) |
| N (1) -Co (1) -N (3)  | 125.95 (13) |
| N (4) -Co (1) -N (3)  | 113.62 (13) |
| N (1) -Co (1) -N (2)  | 79.73 (12)  |
| N (4) -Co (1) -N (2)  | 79.89 (12)  |
| N (3) -Co (1) -N (2)  | 80.03 (12)  |
| N (1) -Co (1) -S (1)  | 85.85 (10)  |
| N (4) -Co (1) -S (1)  | 107.83 (10) |
| N (3) -Co (1) -S (1)  | 107.02 (10) |
| N (2) -Co (1) -S (1)  | 165.39 (8)  |
| C (3) -C (1) -H (1A)  | 109.5       |
| C (3) -C (1) -H (1B)  | 109.5       |
| H (1A) -C (1) -H (1B) | 109.5       |
| C (3) -C (1) -H (1C)  | 109.5       |
| H (1A) -C (1) -H (1C) | 109.5       |
| H (1B) -C (1) -H (1C) | 109.5       |
| C (3) -C (2) -H (2A)  | 109.5       |
| C (3) -C (2) -H (2B)  | 109.5       |
| H (2A) -C (2) -H (2B) | 109.5       |
| C (3) -C (2) -H (2C)  | 109.5       |
| H (2A) -C (2) -H (2C) | 109.5       |
| H (2B) -C (2) -H (2C) | 109.5       |
| C (4) -C (3) -C (2)   | 110.3 (3)   |
| C (4) -C (3) -C (1)   | 107.8 (3)   |
| C (2) -C (3) -C (1)   | 110.2 (4)   |
| C (4) -C (3) -S (1)   | 112.5 (3)   |
| C (2) -C (3) -S (1)   | 107.5 (3)   |
| C (1) -C (3) -S (1)   | 108.6 (3)   |
| N (1) -C (4) -C (3)   | 121.1 (3)   |
| N (1) -C (4) -C (5)   | 121.6 (4)   |
| C (3) -C (4) -C (5)   | 117.3 (3)   |
| C (4) -C (5) -H (5A)  | 109.5       |
| C (4) -C (5) -H (5B)  | 109.5       |
| H (5A) -C (5) -H (5B) | 109.5       |
| C (4) -C (5) -H (5C)  | 109.5       |
| H (5A) -C (5) -H (5C) | 109.5       |
| H (5B) -C (5) -H (5C) | 109.5       |
| N (1) -C (6) -C (7)   | 109.0 (3)   |
| N (1) -C (6) -H (6A)  | 109.9       |
| C (7) -C (6) -H (6A)  | 109.9       |
| N (1) -C (6) -H (6B)  | 109.9       |
| C (7) -C (6) -H (6B)  | 109.9       |
| H (6A) -C (6) -H (6B) | 108.3       |
| N (2) -C (7) -C (6)   | 110.9 (3)   |
| N (2) -C (7) -H (7A)  | 109.5       |
| C (6) -C (7) -H (7A)  | 109.5       |
| N (2) -C (7) -H (7B)  | 109.5       |
| C (6) -C (7) -H (7B)  | 109.5       |
| H (7A) -C (7) -H (7B) | 108.1       |
| N (2) -C (8) -C (9)   | 109.3 (3)   |
| N (2) -C (8) -H (8A)  | 109.8       |
| C (9) -C (8) -H (8A)  | 109.8       |
| N (2) -C (8) -H (8B)  | 109.8       |
| C (9) -C (8) -H (8B)  | 109.8       |
| H (8A) -C (8) -H (8B) | 108.3       |

|                     |            |
|---------------------|------------|
| N(4)-C(9)-C(8)      | 108.9(3)   |
| N(4)-C(9)-H(9A)     | 109.9      |
| C(8)-C(9)-H(9A)     | 109.9      |
| N(4)-C(9)-H(9B)     | 109.9      |
| C(8)-C(9)-H(9B)     | 109.9      |
| H(9A)-C(9)-H(9B)    | 108.3      |
| N(3)-C(10)-C(11)    | 108.9(3)   |
| N(3)-C(10)-H(10A)   | 109.9      |
| C(11)-C(10)-H(10A)  | 109.9      |
| N(3)-C(10)-H(10B)   | 109.9      |
| C(11)-C(10)-H(10B)  | 109.9      |
| H(10A)-C(10)-H(10B) | 108.3      |
| N(2)-C(11)-C(10)    | 110.1(3)   |
| N(2)-C(11)-H(11A)   | 109.6      |
| C(10)-C(11)-H(11A)  | 109.6      |
| N(2)-C(11)-H(11B)   | 109.6      |
| C(10)-C(11)-H(11B)  | 109.6      |
| H(11A)-C(11)-H(11B) | 108.2      |
| C(4)-N(1)-C(6)      | 120.8(3)   |
| C(4)-N(1)-Co(1)     | 120.4(3)   |
| C(6)-N(1)-Co(1)     | 116.9(2)   |
| C(10)-N(3)-Co(1)    | 110.8(2)   |
| C(10)-N(3)-H(2D)    | 109.5      |
| Co(1)-N(3)-H(2D)    | 109.5      |
| C(10)-N(3)-H(2E)    | 109.5      |
| Co(1)-N(3)-H(2E)    | 109.5      |
| H(2D)-N(3)-H(2E)    | 108.1      |
| C(8)-N(2)-C(11)     | 112.1(3)   |
| C(8)-N(2)-C(7)      | 111.4(3)   |
| C(11)-N(2)-C(7)     | 111.1(3)   |
| C(8)-N(2)-Co(1)     | 107.6(2)   |
| C(11)-N(2)-Co(1)    | 107.9(2)   |
| C(7)-N(2)-Co(1)     | 106.5(2)   |
| C(9)-N(4)-Co(1)     | 111.9(2)   |
| C(9)-N(4)-H(4A)     | 109.2      |
| Co(1)-N(4)-H(4A)    | 109.2      |
| C(9)-N(4)-H(4B)     | 109.2      |
| Co(1)-N(4)-H(4B)    | 109.2      |
| H(4A)-N(4)-H(4B)    | 107.9      |
| C(3)-S(1)-Co(1)     | 98.39(14)  |
| F(2)-P(1)-F(1)      | 89.89(15)  |
| F(2)-P(1)-F(4)      | 179.36(17) |
| F(1)-P(1)-F(4)      | 90.68(16)  |
| F(2)-P(1)-F(5)      | 90.15(15)  |
| F(1)-P(1)-F(5)      | 90.47(15)  |
| F(4)-P(1)-F(5)      | 89.55(15)  |
| F(2)-P(1)-F(3)      | 89.77(15)  |
| F(1)-P(1)-F(3)      | 179.60(16) |
| F(4)-P(1)-F(3)      | 89.66(14)  |
| F(5)-P(1)-F(3)      | 89.74(14)  |
| F(2)-P(1)-F(6)      | 90.43(17)  |
| F(1)-P(1)-F(6)      | 90.19(15)  |
| F(4)-P(1)-F(6)      | 89.86(17)  |
| F(5)-P(1)-F(6)      | 179.12(14) |
| F(3)-P(1)-F(6)      | 89.61(14)  |

---

**Table S-18.** Anisotropic displacement parameters ( $\text{\AA}^2 \times 10^3$ ) for  
 $[\text{Co}^{\text{II}}(\text{S}^{\text{Me}_2}\text{N}_4(\text{tren}))](\text{PF}_6)$  (**6**).  
The anisotropic displacement factor exponent takes the form:  
 $-2 \pi^2 [ h^2 a^{*2} U_{11} + \dots + 2 h k a^* b^* U_{12} ]$

|       | U11   | U22   | U33   | U23   | U13    | U12    |
|-------|-------|-------|-------|-------|--------|--------|
| Co(1) | 12(1) | 8(1)  | 13(1) | 0(1)  | 0(1)   | 1(1)   |
| C(1)  | 34(2) | 20(3) | 44(3) | 0(2)  | 20(2)  | -6(2)  |
| C(2)  | 38(2) | 25(3) | 20(2) | 3(2)  | -6(2)  | 10(2)  |
| C(3)  | 19(2) | 12(3) | 18(2) | 0(2)  | 3(2)   | -1(2)  |
| C(4)  | 5(1)  | 21(3) | 15(2) | 0(2)  | 0(1)   | -1(1)  |
| C(5)  | 23(2) | 27(3) | 14(2) | -6(2) | 1(2)   | 4(2)   |
| C(6)  | 19(2) | 6(3)  | 20(2) | -1(2) | -1(1)  | 2(2)   |
| C(7)  | 18(2) | 9(3)  | 22(2) | 2(1)  | 4(2)   | 6(1)   |
| C(8)  | 22(2) | 14(3) | 21(2) | 0(2)  | 2(2)   | -3(2)  |
| C(9)  | 19(2) | 15(3) | 22(2) | 0(2)  | 6(2)   | -5(2)  |
| C(10) | 19(2) | 22(3) | 22(2) | 3(2)  | -7(2)  | 2(2)   |
| C(11) | 28(2) | 18(3) | 17(2) | 0(2)  | -5(2)  | 2(2)   |
| N(1)  | 8(1)  | 7(2)  | 18(1) | -5(1) | 1(1)   | 2(1)   |
| N(3)  | 19(2) | 16(2) | 16(1) | 0(1)  | -2(1)  | -2(1)  |
| N(2)  | 16(1) | 10(2) | 15(1) | 0(1)  | -1(1)  | 1(1)   |
| N(4)  | 15(1) | 13(2) | 20(1) | -2(1) | 2(1)   | 0(1)   |
| F(1)  | 32(2) | 35(2) | 45(2) | -2(1) | -12(1) | -18(1) |
| F(2)  | 24(1) | 32(2) | 47(2) | -9(1) | -7(1)  | 10(1)  |
| F(3)  | 20(1) | 27(2) | 31(1) | -5(1) | -3(1)  | -9(1)  |
| F(4)  | 40(2) | 19(2) | 42(2) | 7(1)  | -15(1) | -1(1)  |
| F(5)  | 32(1) | 32(2) | 21(1) | 0(1)  | 2(1)   | 3(1)   |
| F(6)  | 31(1) | 71(2) | 25(1) | -1(1) | 9(1)   | -18(2) |
| S(1)  | 19(1) | 9(1)  | 18(1) | 1(1)  | -2(1)  | -1(1)  |
| P(1)  | 15(1) | 20(1) | 19(1) | 0(1)  | -2(1)  | -5(1)  |

**Table S-19.** Hydrogen coordinates (  $\times 10^4$ ) and isotropic displacement parameters ( $\text{\AA}^2 \times 10^3$ ) for  $[\text{Co}^{\text{II}}(\text{S}^{\text{Me}_2}\text{N}_4(\text{tren}))](\text{PF}_6)$  (**6**).

|         | x     | y    | z     | U (eq) |
|---------|-------|------|-------|--------|
| H (1A)  | -1515 | 1990 | 11839 | 49     |
| H (1B)  | -2432 | 2912 | 11400 | 49     |
| H (1C)  | -1959 | 3064 | 12257 | 49     |
| H (2A)  | 1473  | 2213 | 12192 | 41     |
| H (2B)  | 1010  | 3275 | 12620 | 41     |
| H (2C)  | 2400  | 3285 | 11994 | 41     |
| H (5A)  | -459  | 5788 | 12051 | 32     |
| H (5B)  | 621   | 4945 | 12494 | 32     |
| H (5C)  | -1321 | 4806 | 12447 | 32     |
| H (6A)  | 643   | 6333 | 10909 | 18     |
| H (6B)  | -1274 | 6209 | 11077 | 18     |
| H (7A)  | -1898 | 6026 | 9835  | 20     |
| H (7B)  | -637  | 6989 | 9864  | 20     |
| H (8A)  | 2259  | 6468 | 9890  | 23     |
| H (8B)  | 1973  | 6726 | 9026  | 23     |
| H (9A)  | 3083  | 5107 | 8675  | 22     |
| H (9B)  | 4368  | 5659 | 9225  | 22     |
| H (10A) | -2476 | 4731 | 9001  | 25     |
| H (10B) | -1895 | 4447 | 8172  | 25     |
| H (11A) | 498   | 5418 | 8315  | 25     |
| H (11B) | -991  | 6163 | 8557  | 25     |
| H (2D)  | 80    | 3409 | 8614  | 21     |
| H (2E)  | -1354 | 3133 | 9085  | 21     |
| H (4A)  | 3648  | 4608 | 10149 | 19     |
| H (4B)  | 3662  | 3873 | 9505  | 19     |

Symmetry transformations used to generate equivalent atoms:

**Table S-20.** Crystal data and structure refinement for  $[\text{Cu}^{\text{II}}(\text{S}^{\text{Me}_2}\text{N}_4(\text{tren}))](\text{PF}_6)$  (**7**).

|                                                                   |                                                                                                         |
|-------------------------------------------------------------------|---------------------------------------------------------------------------------------------------------|
| Empirical formula                                                 | C11 H25 Cu F6 N4 P S                                                                                    |
| Formula weight                                                    | 453.92                                                                                                  |
| Temperature                                                       | 130(2) K                                                                                                |
| Wavelength                                                        | 0.71070 Å                                                                                               |
| Crystal description/color                                         | block / green                                                                                           |
| Crystal system, space group                                       | Orthorhombic, P 21 21 21 (no. 19)                                                                       |
| Unit cell dimensions                                              | a = 8.1120(5) Å alpha = 90 deg.<br>b = 12.7400(4) Å beta = 90 deg.<br>c = 18.0310(11) Å gamma = 90 deg. |
| Volume                                                            | 1863.45(17) Å <sup>3</sup>                                                                              |
| Z, Calculated density                                             | 4, 1.618 Mg/m <sup>3</sup>                                                                              |
| Absorption coefficient                                            | 1.428 mm <sup>-1</sup>                                                                                  |
| F(000)                                                            | 932                                                                                                     |
| Crystal size                                                      | 0.22 x 0.19 x 0.10 mm                                                                                   |
| Reflections for indexing                                          | 592                                                                                                     |
| Theta range for data collection                                   | 3.38 to 26.34 deg.                                                                                      |
| Index ranges                                                      | -10<=h<=10, -13<=k<=13, -22<=l<=22                                                                      |
| Reflections collected / unique                                    | 3509 / 3509 [R(int) = 0.0619]                                                                           |
| Completeness to theta = 26.34                                     | 93.8%                                                                                                   |
| Absorption correction                                             | HKL-SCALEPACK                                                                                           |
| Max. and min. transmission                                        | 0.8751 and 0.7479                                                                                       |
| Refinement method                                                 | Full-matrix least-squares on F <sup>2</sup>                                                             |
| Data / restraints / parameters                                    | 3509 / 0 / 220                                                                                          |
| Goodness-of-fit on F <sup>2</sup>                                 | S = 0.995                                                                                               |
| S = root(sum(w*D*D)/(n-p)), where D = (Fo*Fo - Fc*Fc)             |                                                                                                         |
| Final R indices [I>2sigma(I)]                                     | *R1 = 0.0417, wR2 = 0.0862                                                                              |
| R indices (all data)                                              | R1 = 0.0603, *wR2 = 0.0916                                                                              |
| *Report these R factors.                                          |                                                                                                         |
| R1 = sum  Fo - Fc  /sum Fo , wR2= root(sum(w*D*D)/sum(w*Fo*Fo)),  |                                                                                                         |
| where D = (Fo*Fo - Fc*Fc)                                         |                                                                                                         |
| Weighting scheme                                                  |                                                                                                         |
| calc w=1/[\s^2*(Fo^2)+(0.0457P)^2+0.0000P] where P=(Fo^2+2Fc^2)/3 |                                                                                                         |
| Absolute structure parameter                                      | 0.014(16)                                                                                               |
| Largest diff. peak and hole                                       | 0.412 and -0.448 e.Å <sup>-3</sup>                                                                      |

**Table S-21.** Atomic coordinates ( $\times 10^4$ ) and equivalent isotropic displacement parameters ( $\text{\AA}^2 \times 10^3$ ) for  $[\text{Cu}^{\text{II}}(\text{S}^{\text{Me}_2}\text{N}_4(\text{tren}))](\text{PF}_6)$  (**7**).  $U(\text{eq})$  is defined as one third of the trace of the orthogonalized  $U_{ij}$  tensor.

|       | x        | y       | z       | U(eq) |
|-------|----------|---------|---------|-------|
| C(1)  | 6626(6)  | 2824(4) | 3207(3) | 40(1) |
| C(2)  | 3632(7)  | 3039(4) | 2848(2) | 37(1) |
| C(3)  | 4928(5)  | 3293(3) | 3432(2) | 23(1) |
| C(4)  | 5150(5)  | 4467(3) | 3506(2) | 18(1) |
| C(5)  | 5310(6)  | 5109(3) | 2807(2) | 24(1) |
| C(6)  | 5415(6)  | 6023(3) | 4252(2) | 20(1) |
| C(7)  | 5825(5)  | 6204(3) | 5063(2) | 22(1) |
| C(8)  | 5411(6)  | 5435(3) | 6299(2) | 26(1) |
| C(9)  | 6512(6)  | 4483(3) | 6301(2) | 24(1) |
| C(10) | 3046(5)  | 6096(3) | 5594(2) | 22(1) |
| C(11) | 1738(6)  | 5279(3) | 5802(2) | 25(1) |
| N(1)  | 5182(4)  | 4891(2) | 4147(2) | 20(1) |
| N(2)  | 4683(4)  | 5596(2) | 5552(2) | 17(1) |
| N(3)  | 5576(5)  | 3576(2) | 5998(2) | 22(1) |
| N(4)  | 1864(4)  | 4409(2) | 5276(2) | 22(1) |
| F(1)  | 10893(3) | 143(2)  | 1790(2) | 38(1) |
| F(2)  | 8370(3)  | 1981(2) | 1387(2) | 34(1) |
| F(3)  | 10362(4) | 1113(2) | 757(1)  | 42(1) |
| F(4)  | 8903(3)  | 1016(2) | 2412(1) | 30(1) |
| F(5)  | 10967(3) | 1911(2) | 1848(2) | 40(1) |
| F(6)  | 8307(3)  | 214(2)  | 1326(1) | 30(1) |
| P(1)  | 9642(2)  | 1058(1) | 1590(1) | 23(1) |
| S(1)  | 4294(2)  | 2700(1) | 4319(1) | 22(1) |
| Cu(1) | 4455(1)  | 4134(1) | 5046(1) | 18(1) |

**Table S-22.** Bond lengths [Å] and angles [deg] for [Cu<sup>II</sup>(S<sup>Me</sup><sub>2</sub>N<sub>4</sub>(tren))](PF<sub>6</sub>) (7).

---

|                 |            |
|-----------------|------------|
| C(1)-C(3)       | 1.556(6)   |
| C(1)-H(1A)      | 0.9800     |
| C(1)-H(1B)      | 0.9800     |
| C(1)-H(1C)      | 0.9800     |
| C(2)-C(3)       | 1.523(6)   |
| C(2)-H(2A)      | 0.9800     |
| C(2)-H(2B)      | 0.9800     |
| C(2)-H(2C)      | 0.9800     |
| C(3)-C(4)       | 1.512(6)   |
| C(3)-S(1)       | 1.842(4)   |
| C(4)-N(1)       | 1.275(5)   |
| C(4)-C(5)       | 1.510(5)   |
| C(5)-H(5A)      | 0.9800     |
| C(5)-H(5B)      | 0.9800     |
| C(5)-H(5C)      | 0.9800     |
| C(6)-N(1)       | 1.466(5)   |
| C(6)-C(7)       | 1.516(5)   |
| C(6)-H(6A)      | 0.9900     |
| C(6)-H(6B)      | 0.9900     |
| C(7)-N(2)       | 1.495(5)   |
| C(7)-H(7A)      | 0.9900     |
| C(7)-H(7B)      | 0.9900     |
| C(8)-N(2)       | 1.486(5)   |
| C(8)-C(9)       | 1.506(6)   |
| C(8)-H(8A)      | 0.9900     |
| C(8)-H(8B)      | 0.9900     |
| C(9)-N(3)       | 1.486(5)   |
| C(9)-H(9A)      | 0.9900     |
| C(9)-H(9B)      | 0.9900     |
| C(10)-N(2)      | 1.475(6)   |
| C(10)-C(11)     | 1.534(6)   |
| C(10)-H(10A)    | 0.9900     |
| C(10)-H(10B)    | 0.9900     |
| C(11)-N(4)      | 1.462(5)   |
| C(11)-H(11A)    | 0.9900     |
| C(11)-H(11B)    | 0.9900     |
| N(1)-Cu(1)      | 1.977(3)   |
| N(2)-Cu(1)      | 2.082(3)   |
| N(3)-Cu(1)      | 2.068(3)   |
| N(3)-H(3A)      | 0.9200     |
| N(3)-H(3B)      | 0.9200     |
| N(4)-Cu(1)      | 2.171(4)   |
| N(4)-H(4A)      | 0.9200     |
| N(4)-H(4B)      | 0.9200     |
| F(1)-P(1)       | 1.588(3)   |
| F(2)-P(1)       | 1.606(3)   |
| F(3)-P(1)       | 1.613(3)   |
| F(4)-P(1)       | 1.600(2)   |
| F(5)-P(1)       | 1.597(3)   |
| F(6)-P(1)       | 1.599(3)   |
| S(1)-Cu(1)      | 2.2537(10) |
| C(3)-C(1)-H(1A) | 109.5      |

|                          |           |
|--------------------------|-----------|
| C (3) -C (1) -H (1B)     | 109.5     |
| H (1A) -C (1) -H (1B)    | 109.5     |
| C (3) -C (1) -H (1C)     | 109.5     |
| H (1A) -C (1) -H (1C)    | 109.5     |
| H (1B) -C (1) -H (1C)    | 109.5     |
| C (3) -C (2) -H (2A)     | 109.5     |
| C (3) -C (2) -H (2B)     | 109.5     |
| H (2A) -C (2) -H (2B)    | 109.5     |
| C (3) -C (2) -H (2C)     | 109.5     |
| H (2A) -C (2) -H (2C)    | 109.5     |
| H (2B) -C (2) -H (2C)    | 109.5     |
| C (4) -C (3) -C (2)      | 110.7 (4) |
| C (4) -C (3) -C (1)      | 107.3 (4) |
| C (2) -C (3) -C (1)      | 110.4 (4) |
| C (4) -C (3) -S (1)      | 111.2 (3) |
| C (2) -C (3) -S (1)      | 108.7 (3) |
| C (1) -C (3) -S (1)      | 108.4 (3) |
| N (1) -C (4) -C (5)      | 121.7 (4) |
| N (1) -C (4) -C (3)      | 120.1 (4) |
| C (5) -C (4) -C (3)      | 118.2 (3) |
| C (4) -C (5) -H (5A)     | 109.5     |
| C (4) -C (5) -H (5B)     | 109.5     |
| H (5A) -C (5) -H (5B)    | 109.5     |
| C (4) -C (5) -H (5C)     | 109.5     |
| H (5A) -C (5) -H (5C)    | 109.5     |
| H (5B) -C (5) -H (5C)    | 109.5     |
| N (1) -C (6) -C (7)      | 107.6 (3) |
| N (1) -C (6) -H (6A)     | 110.2     |
| C (7) -C (6) -H (6A)     | 110.2     |
| N (1) -C (6) -H (6B)     | 110.2     |
| C (7) -C (6) -H (6B)     | 110.2     |
| H (6A) -C (6) -H (6B)    | 108.5     |
| N (2) -C (7) -C (6)      | 110.7 (3) |
| N (2) -C (7) -H (7A)     | 109.5     |
| C (6) -C (7) -H (7A)     | 109.5     |
| N (2) -C (7) -H (7B)     | 109.5     |
| C (6) -C (7) -H (7B)     | 109.5     |
| H (7A) -C (7) -H (7B)    | 108.1     |
| N (2) -C (8) -C (9)      | 110.4 (3) |
| N (2) -C (8) -H (8A)     | 109.6     |
| C (9) -C (8) -H (8A)     | 109.6     |
| N (2) -C (8) -H (8B)     | 109.6     |
| C (9) -C (8) -H (8B)     | 109.6     |
| H (8A) -C (8) -H (8B)    | 108.1     |
| N (3) -C (9) -C (8)      | 108.8 (4) |
| N (3) -C (9) -H (9A)     | 109.9     |
| C (8) -C (9) -H (9A)     | 109.9     |
| N (3) -C (9) -H (9B)     | 109.9     |
| C (8) -C (9) -H (9B)     | 109.9     |
| H (9A) -C (9) -H (9B)    | 108.3     |
| N (2) -C (10) -C (11)    | 110.0 (3) |
| N (2) -C (10) -H (10A)   | 109.7     |
| C (11) -C (10) -H (10A)  | 109.7     |
| N (2) -C (10) -H (10B)   | 109.7     |
| C (11) -C (10) -H (10B)  | 109.7     |
| H (10A) -C (10) -H (10B) | 108.2     |
| N (4) -C (11) -C (10)    | 107.9 (3) |



|                     |            |
|---------------------|------------|
| N(4)-C(11)-H(11A)   | 110.1      |
| C(10)-C(11)-H(11A)  | 110.1      |
| N(4)-C(11)-H(11B)   | 110.1      |
| C(10)-C(11)-H(11B)  | 110.1      |
| H(11A)-C(11)-H(11B) | 108.4      |
| C(4)-N(1)-C(6)      | 122.5(3)   |
| C(4)-N(1)-Cu(1)     | 122.0(3)   |
| C(6)-N(1)-Cu(1)     | 114.3(2)   |
| C(10)-N(2)-C(8)     | 111.8(3)   |
| C(10)-N(2)-C(7)     | 111.4(3)   |
| C(8)-N(2)-C(7)      | 111.1(3)   |
| C(10)-N(2)-Cu(1)    | 109.2(2)   |
| C(8)-N(2)-Cu(1)     | 108.0(2)   |
| C(7)-N(2)-Cu(1)     | 105.1(2)   |
| C(9)-N(3)-Cu(1)     | 105.2(2)   |
| C(9)-N(3)-H(3A)     | 110.7      |
| Cu(1)-N(3)-H(3A)    | 110.7      |
| C(9)-N(3)-H(3B)     | 110.7      |
| Cu(1)-N(3)-H(3B)    | 110.7      |
| H(3A)-N(3)-H(3B)    | 108.8      |
| C(11)-N(4)-Cu(1)    | 108.3(3)   |
| C(11)-N(4)-H(4A)    | 110.0      |
| Cu(1)-N(4)-H(4A)    | 110.0      |
| C(11)-N(4)-H(4B)    | 110.0      |
| Cu(1)-N(4)-H(4B)    | 110.0      |
| H(4A)-N(4)-H(4B)    | 108.4      |
| F(1)-P(1)-F(5)      | 90.16(15)  |
| F(1)-P(1)-F(6)      | 90.37(14)  |
| F(5)-P(1)-F(6)      | 179.42(15) |
| F(1)-P(1)-F(4)      | 90.21(14)  |
| F(5)-P(1)-F(4)      | 90.28(14)  |
| F(6)-P(1)-F(4)      | 89.97(14)  |
| F(1)-P(1)-F(2)      | 179.78(17) |
| F(5)-P(1)-F(2)      | 90.05(15)  |
| F(6)-P(1)-F(2)      | 89.43(14)  |
| F(4)-P(1)-F(2)      | 89.72(14)  |
| F(1)-P(1)-F(3)      | 90.70(15)  |
| F(5)-P(1)-F(3)      | 89.87(15)  |
| F(6)-P(1)-F(3)      | 89.87(14)  |
| F(4)-P(1)-F(3)      | 179.08(16) |
| F(2)-P(1)-F(3)      | 89.38(15)  |
| C(3)-S(1)-Cu(1)     | 98.98(14)  |
| N(1)-Cu(1)-N(3)     | 135.86(16) |
| N(1)-Cu(1)-N(2)     | 84.05(12)  |
| N(3)-Cu(1)-N(2)     | 84.57(12)  |
| N(1)-Cu(1)-N(4)     | 111.52(13) |
| N(3)-Cu(1)-N(4)     | 108.81(15) |
| N(2)-Cu(1)-N(4)     | 81.86(13)  |
| N(1)-Cu(1)-S(1)     | 86.29(10)  |
| N(3)-Cu(1)-S(1)     | 103.29(9)  |
| N(2)-Cu(1)-S(1)     | 170.27(9)  |
| N(4)-Cu(1)-S(1)     | 100.68(9)  |

---

Symmetry transformations used to generate equivalent atoms:

**Table S-23.** Anisotropic displacement parameters ( $\text{Å}^2 \times 10^3$ ) for  
 $[\text{Cu}^{\text{II}}(\text{S}^{\text{Me}_2}\text{N}_4(\text{tren}))](\text{PF}_6)$  (**7**).  
The anisotropic displacement factor exponent takes the form:  
 $-2 \pi^2 [ h^2 a^{*2} U_{11} + \dots + 2 h k a^* b^* U_{12} ]$

|        | U11    | U22    | U33    | U23    | U13     | U12     |
|--------|--------|--------|--------|--------|---------|---------|
| C (1)  | 38 (3) | 41 (3) | 40 (3) | -7 (2) | 18 (3)  | 10 (2)  |
| C (2)  | 57 (4) | 33 (3) | 20 (3) | -2 (2) | -6 (3)  | -16 (2) |
| C (3)  | 27 (3) | 26 (2) | 15 (2) | -3 (2) | 1 (2)   | 0 (2)   |
| C (4)  | 14 (2) | 21 (2) | 18 (2) | -1 (2) | 1 (2)   | 3 (2)   |
| C (5)  | 26 (3) | 29 (2) | 18 (2) | 0 (2)  | 0 (2)   | 0 (2)   |
| C (6)  | 23 (2) | 14 (2) | 22 (2) | 2 (2)  | 3 (2)   | 0 (2)   |
| C (7)  | 27 (2) | 17 (2) | 23 (2) | -1 (2) | 7 (2)   | -3 (2)  |
| C (8)  | 31 (3) | 29 (2) | 18 (2) | -3 (2) | 0 (2)   | -1 (2)  |
| C (9)  | 26 (3) | 24 (2) | 22 (2) | 0 (2)  | -9 (2)  | -5 (2)  |
| C (10) | 26 (2) | 18 (2) | 23 (2) | 1 (2)  | 1 (2)   | 2 (2)   |
| C (11) | 26 (3) | 26 (2) | 24 (3) | -2 (2) | 5 (2)   | 1 (2)   |
| N (1)  | 16 (2) | 25 (2) | 20 (2) | 1 (1)  | 1 (2)   | -1 (2)  |
| N (2)  | 23 (2) | 16 (2) | 14 (2) | -2 (1) | -3 (2)  | -1 (1)  |
| N (3)  | 24 (2) | 21 (2) | 20 (2) | 2 (1)  | 1 (2)   | 1 (2)   |
| N (4)  | 20 (2) | 25 (2) | 21 (2) | 1 (1)  | 2 (2)   | -4 (2)  |
| F (1)  | 32 (2) | 43 (2) | 41 (2) | -3 (1) | -1 (2)  | 9 (1)   |
| F (2)  | 39 (2) | 25 (1) | 40 (2) | 9 (1)  | -10 (2) | 4 (1)   |
| F (3)  | 34 (2) | 69 (2) | 22 (1) | -2 (1) | 7 (1)   | -12 (2) |
| F (4)  | 35 (2) | 38 (1) | 18 (1) | 0 (1)  | 0 (1)   | 4 (1)   |
| F (5)  | 36 (2) | 39 (2) | 45 (2) | -2 (1) | -12 (1) | -19 (1) |
| F (6)  | 26 (2) | 33 (2) | 32 (2) | -8 (1) | -3 (1)  | -10 (1) |
| P (1)  | 21 (1) | 27 (1) | 20 (1) | 0 (1)  | -1 (1)  | -5 (1)  |
| S (1)  | 31 (1) | 17 (1) | 20 (1) | 0 (1)  | -2 (1)  | 1 (1)   |
| Cu (1) | 22 (1) | 16 (1) | 16 (1) | 0 (1)  | -1 (1)  | -1 (1)  |

**Table S-24.** Hydrogen coordinates (  $\times 10^4$ ) and isotropic displacement parameters ( $\text{\AA}^2 \times 10^3$ ) for  $[\text{Cu}^{\text{II}}(\text{S}^{\text{Me}_2}\text{N}_4(\text{tren}))](\text{PF}_6)$  (**7**).

|         | x    | y    | z    | U(eq) |
|---------|------|------|------|-------|
| H (1A)  | 6978 | 3127 | 2733 | 60    |
| H (1B)  | 6528 | 2061 | 3157 | 60    |
| H (1C)  | 7443 | 2989 | 3590 | 60    |
| H (2A)  | 2601 | 3400 | 2970 | 55    |
| H (2B)  | 3441 | 2279 | 2837 | 55    |
| H (2C)  | 4021 | 3273 | 2361 | 55    |
| H (5A)  | 4249 | 5440 | 2692 | 36    |
| H (5B)  | 5637 | 4651 | 2395 | 36    |
| H (5C)  | 6149 | 5654 | 2878 | 36    |
| H (6A)  | 4397 | 6406 | 4117 | 24    |
| H (6B)  | 6325 | 6278 | 3934 | 24    |
| H (7A)  | 6976 | 5985 | 5160 | 27    |
| H (7B)  | 5732 | 6961 | 5178 | 27    |
| H (8A)  | 4519 | 5341 | 6668 | 31    |
| H (8B)  | 6059 | 6062 | 6442 | 31    |
| H (9A)  | 7500 | 4616 | 5993 | 29    |
| H (9B)  | 6879 | 4328 | 6813 | 29    |
| H (10A) | 2768 | 6414 | 5109 | 27    |
| H (10B) | 3064 | 6662 | 5970 | 27    |
| H (11A) | 1927 | 5023 | 6314 | 31    |
| H (11B) | 625  | 5595 | 5778 | 31    |
| H (3A)  | 4801 | 3348 | 6334 | 26    |
| H (3B)  | 6275 | 3029 | 5889 | 26    |
| H (4A)  | 1316 | 4572 | 4845 | 26    |
| H (4B)  | 1395 | 3814 | 5475 | 26    |

**Table S-25.** Crystal data and structure refinement for  $[\text{Zn}^{\text{II}}(\text{S}^{\text{Me}_2}\text{N}_4(\text{tren}))](\text{PF}_6)$  (**8**).

|                                                                                               |                                                                                                     |
|-----------------------------------------------------------------------------------------------|-----------------------------------------------------------------------------------------------------|
| Empirical formula                                                                             | C11 H25 F6 N4 P S Zn                                                                                |
| Formula weight                                                                                | 455.75                                                                                              |
| Temperature                                                                                   | 130(2) K                                                                                            |
| Wavelength                                                                                    | 0.71070 Å                                                                                           |
| Crystal description/color                                                                     | block / clear                                                                                       |
| Crystal system, space group                                                                   | Orthorhombic, P 21 21 21 (no. 19)                                                                   |
| Unit cell dimensions                                                                          | a = 8.1600(3)Å alpha = 90 deg.<br>b = 12.7280(4)Å beta = 90 deg.<br>c = 17.9620(5)Å gamma = 90 deg. |
| Volume                                                                                        | 1865.54(10) Å <sup>3</sup>                                                                          |
| Z, Calculated density                                                                         | 4, 1.623 Mg/m <sup>3</sup>                                                                          |
| Absorption coefficient                                                                        | 1.572 mm <sup>-1</sup>                                                                              |
| F(000)                                                                                        | 936                                                                                                 |
| Crystal size                                                                                  | 0.48 x 0.43 x 0.31 mm                                                                               |
| Reflections for indexing                                                                      | 1020                                                                                                |
| Theta range for data collection                                                               | 3.37 to 28.26 deg.                                                                                  |
| Index ranges                                                                                  | -10<=h<=10, -16<=k<=16, -22<=l<=23                                                                  |
| Reflections collected / unique                                                                | 4221 / 4221 [R(int) = 0.0492]                                                                       |
| Completeness to theta = 28.26                                                                 | 96.0%                                                                                               |
| Absorption correction                                                                         | HKL-SCALEPACK                                                                                       |
| Max. and min. transmission                                                                    | 0.6414 and 0.5191                                                                                   |
| Refinement method                                                                             | Full-matrix least-squares on F <sup>2</sup>                                                         |
| Data / restraints / parameters                                                                | 4221 / 0 / 220                                                                                      |
| Goodness-of-fit on F <sup>2</sup>                                                             | S = 1.015                                                                                           |
| S = root(sum(w*D*D)/(n-p)), where D = (Fo*Fo - Fc*Fc)                                         |                                                                                                     |
| Final R indices [I>2sigma(I)]                                                                 | *R1 = 0.0280, wR2 = 0.0674                                                                          |
| R indices (all data)                                                                          | R1 = 0.0318, *wR2 = 0.0691                                                                          |
| *Report these R factors.                                                                      |                                                                                                     |
| R1 = sum  Fo - Fc  /sum Fo , wR2= root(sum(w*D*D)/sum(w*Fo*Fo)),<br>where D = (Fo*Fo - Fc*Fc) |                                                                                                     |
| Weighting scheme                                                                              | calc w=1/[\s^2^(Fo^2^)+(0.0349P)^2^+0.8362P] where P=(Fo^2^+2Fc^2^)/3                               |
| Absolute structure parameter                                                                  | -0.012(9)                                                                                           |
| Largest diff. peak and hole                                                                   | 0.318 and -0.367 e.Å <sup>-3</sup>                                                                  |

**Table S-26.** Atomic coordinates ( $\times 10^4$ ) and equivalent isotropic displacement parameters ( $\text{\AA}^2 \times 10^3$ ) for  $[\text{Zn}^{\text{II}}(\text{S}^{\text{Me}_2}\text{N}_4(\text{tren}))](\text{PF}_6)$  (**8**).  $U(\text{eq})$  is defined as one third of the trace of the orthogonalized  $U_{ij}$  tensor.

|       | x        | y        | z        | U(eq) |
|-------|----------|----------|----------|-------|
| C(1)  | 3369(4)  | 2240(2)  | 8228(2)  | 31(1) |
| C(2)  | 6332(4)  | 2018(2)  | 7844(2)  | 28(1) |
| C(3)  | 5058(3)  | 1782(2)  | 8449(1)  | 17(1) |
| C(4)  | 4841(3)  | 595(2)   | 8533(1)  | 14(1) |
| C(5)  | 4660(3)  | -34(2)   | 7827(1)  | 19(1) |
| C(6)  | 4609(3)  | -976(2)  | 9250(1)  | 16(1) |
| C(7)  | 4231(3)  | -1235(2) | 10059(1) | 18(1) |
| C(8)  | 6994(3)  | -1156(2) | 10604(1) | 19(1) |
| C(9)  | 8258(3)  | -331(2)  | 10815(2) | 21(1) |
| C(10) | 4612(3)  | -537(2)  | 11317(1) | 20(1) |
| C(11) | 3501(3)  | 418(2)   | 11324(2) | 21(1) |
| N(1)  | 4809(2)  | 169(2)   | 9174(1)  | 14(1) |
| N(2)  | 5346(2)  | -686(2)  | 10574(1) | 16(1) |
| N(4)  | 8138(2)  | 566(2)   | 10297(1) | 16(1) |
| N(3)  | 4413(3)  | 1355(2)  | 11048(1) | 17(1) |
| F(1)  | 8306(2)  | -136(1)  | 8684(1)  | 26(1) |
| F(2)  | 8872(2)  | -948(1)  | 7597(1)  | 27(1) |
| F(3)  | 10851(2) | -37(1)   | 8195(1)  | 34(1) |
| F(4)  | 10398(2) | -992(2)  | 9244(1)  | 40(1) |
| F(5)  | 8418(2)  | -1903(1) | 8637(1)  | 33(1) |
| F(6)  | 10982(2) | -1805(1) | 8151(1)  | 37(1) |
| P(1)  | 9647(1)  | -972(1)  | 8417(1)  | 19(1) |
| S(1)  | 5753(1)  | 2426(1)  | 9310(1)  | 16(1) |
| Zn(1) | 5708(1)  | 972(1)   | 10091(1) | 13(1) |

**Table S-27.** Bond lengths [Å] and angles [deg] for [Zn<sup>II</sup>(S<sup>Me</sup><sub>2</sub>N<sub>4</sub>(tren))](PF<sub>6</sub>) (**8**).

---

|              |            |
|--------------|------------|
| C(1)-C(3)    | 1.548(4)   |
| C(1)-H(1A)   | 0.9800     |
| C(1)-H(1B)   | 0.9800     |
| C(1)-H(1C)   | 0.9800     |
| C(2)-C(3)    | 1.534(4)   |
| C(2)-H(2A)   | 0.9800     |
| C(2)-H(2B)   | 0.9800     |
| C(2)-H(2C)   | 0.9800     |
| C(3)-C(4)    | 1.528(3)   |
| C(3)-S(1)    | 1.840(2)   |
| C(4)-N(1)    | 1.272(3)   |
| C(4)-C(5)    | 1.507(3)   |
| C(5)-H(5A)   | 0.9800     |
| C(5)-H(5B)   | 0.9800     |
| C(5)-H(5C)   | 0.9800     |
| C(6)-N(1)    | 1.473(3)   |
| C(6)-C(7)    | 1.521(3)   |
| C(6)-H(6A)   | 0.9900     |
| C(6)-H(6B)   | 0.9900     |
| C(7)-N(2)    | 1.474(3)   |
| C(7)-H(7A)   | 0.9900     |
| C(7)-H(7B)   | 0.9900     |
| C(8)-N(2)    | 1.473(3)   |
| C(8)-C(9)    | 1.521(4)   |
| C(8)-H(8A)   | 0.9900     |
| C(8)-H(8B)   | 0.9900     |
| C(9)-N(4)    | 1.476(3)   |
| C(9)-H(9A)   | 0.9900     |
| C(9)-H(9B)   | 0.9900     |
| C(10)-N(2)   | 1.475(3)   |
| C(10)-C(11)  | 1.516(4)   |
| C(10)-H(10A) | 0.9900     |
| C(10)-H(10B) | 0.9900     |
| C(11)-N(3)   | 1.490(3)   |
| C(11)-H(11A) | 0.9900     |
| C(11)-H(11B) | 0.9900     |
| N(1)-Zn(1)   | 2.0738(19) |
| N(2)-Zn(1)   | 2.3008(19) |
| N(4)-Zn(1)   | 2.083(2)   |
| N(4)-H(3A)   | 0.9200     |
| N(4)-H(3B)   | 0.9200     |
| N(3)-Zn(1)   | 2.075(2)   |
| N(3)-H(4A)   | 0.9200     |
| N(3)-H(4B)   | 0.9200     |
| F(1)-P(1)    | 1.5994(16) |
| F(2)-P(1)    | 1.6030(15) |
| F(3)-P(1)    | 1.5936(18) |
| F(4)-P(1)    | 1.6067(17) |
| F(5)-P(1)    | 1.6018(18) |
| F(6)-P(1)    | 1.5940(17) |
| S(1)-Zn(1)   | 2.3220(6)  |

|                          |             |
|--------------------------|-------------|
| C (3) -C (1) -H (1A)     | 109.5       |
| C (3) -C (1) -H (1B)     | 109.5       |
| H (1A) -C (1) -H (1B)    | 109.5       |
| C (3) -C (1) -H (1C)     | 109.5       |
| H (1A) -C (1) -H (1C)    | 109.5       |
| H (1B) -C (1) -H (1C)    | 109.5       |
| C (3) -C (2) -H (2A)     | 109.5       |
| C (3) -C (2) -H (2B)     | 109.5       |
| H (2A) -C (2) -H (2B)    | 109.5       |
| C (3) -C (2) -H (2C)     | 109.5       |
| H (2A) -C (2) -H (2C)    | 109.5       |
| H (2B) -C (2) -H (2C)    | 109.5       |
| C (4) -C (3) -C (2)      | 109.9 (2)   |
| C (4) -C (3) -C (1)      | 107.2 (2)   |
| C (2) -C (3) -C (1)      | 110.4 (2)   |
| C (4) -C (3) -S (1)      | 113.15 (16) |
| C (2) -C (3) -S (1)      | 107.43 (17) |
| C (1) -C (3) -S (1)      | 108.81 (18) |
| N (1) -C (4) -C (5)      | 122.1 (2)   |
| N (1) -C (4) -C (3)      | 120.9 (2)   |
| C (5) -C (4) -C (3)      | 117.0 (2)   |
| C (4) -C (5) -H (5A)     | 109.5       |
| C (4) -C (5) -H (5B)     | 109.5       |
| H (5A) -C (5) -H (5B)    | 109.5       |
| C (4) -C (5) -H (5C)     | 109.5       |
| H (5A) -C (5) -H (5C)    | 109.5       |
| H (5B) -C (5) -H (5C)    | 109.5       |
| N (1) -C (6) -C (7)      | 109.02 (19) |
| N (1) -C (6) -H (6A)     | 109.9       |
| C (7) -C (6) -H (6A)     | 109.9       |
| N (1) -C (6) -H (6B)     | 109.9       |
| C (7) -C (6) -H (6B)     | 109.9       |
| H (6A) -C (6) -H (6B)    | 108.3       |
| N (2) -C (7) -C (6)      | 111.77 (19) |
| N (2) -C (7) -H (7A)     | 109.3       |
| C (6) -C (7) -H (7A)     | 109.3       |
| N (2) -C (7) -H (7B)     | 109.3       |
| C (6) -C (7) -H (7B)     | 109.3       |
| H (7A) -C (7) -H (7B)    | 107.9       |
| N (2) -C (8) -C (9)      | 110.34 (19) |
| N (2) -C (8) -H (8A)     | 109.6       |
| C (9) -C (8) -H (8A)     | 109.6       |
| N (2) -C (8) -H (8B)     | 109.6       |
| C (9) -C (8) -H (8B)     | 109.6       |
| H (8A) -C (8) -H (8B)    | 108.1       |
| N (4) -C (9) -C (8)      | 109.4 (2)   |
| N (4) -C (9) -H (9A)     | 109.8       |
| C (8) -C (9) -H (9A)     | 109.8       |
| N (4) -C (9) -H (9B)     | 109.8       |
| C (8) -C (9) -H (9B)     | 109.8       |
| H (9A) -C (9) -H (9B)    | 108.2       |
| N (2) -C (10) -C (11)    | 110.67 (19) |
| N (2) -C (10) -H (10A)   | 109.5       |
| C (11) -C (10) -H (10A)  | 109.5       |
| N (2) -C (10) -H (10B)   | 109.5       |
| C (11) -C (10) -H (10B)  | 109.5       |
| H (10A) -C (10) -H (10B) | 108.1       |

|                     |            |
|---------------------|------------|
| N(3)-C(11)-C(10)    | 109.9(2)   |
| N(3)-C(11)-H(11A)   | 109.7      |
| C(10)-C(11)-H(11A)  | 109.7      |
| N(3)-C(11)-H(11B)   | 109.7      |
| C(10)-C(11)-H(11B)  | 109.7      |
| H(11A)-C(11)-H(11B) | 108.2      |
| C(4)-N(1)-C(6)      | 120.6(2)   |
| C(4)-N(1)-Zn(1)     | 120.04(16) |
| C(6)-N(1)-Zn(1)     | 116.93(15) |
| C(8)-N(2)-C(7)      | 113.19(18) |
| C(8)-N(2)-C(10)     | 112.94(19) |
| C(7)-N(2)-C(10)     | 112.20(19) |
| C(8)-N(2)-Zn(1)     | 105.65(14) |
| C(7)-N(2)-Zn(1)     | 106.14(13) |
| C(10)-N(2)-Zn(1)    | 105.98(14) |
| C(9)-N(4)-Zn(1)     | 111.54(15) |
| C(9)-N(4)-H(3A)     | 109.3      |
| Zn(1)-N(4)-H(3A)    | 109.3      |
| C(9)-N(4)-H(3B)     | 109.3      |
| Zn(1)-N(4)-H(3B)    | 109.3      |
| H(3A)-N(4)-H(3B)    | 108.0      |
| C(11)-N(3)-Zn(1)    | 109.99(15) |
| C(11)-N(3)-H(4A)    | 109.7      |
| Zn(1)-N(3)-H(4A)    | 109.7      |
| C(11)-N(3)-H(4B)    | 109.7      |
| Zn(1)-N(3)-H(4B)    | 109.7      |
| H(4A)-N(3)-H(4B)    | 108.2      |
| F(3)-P(1)-F(6)      | 90.01(9)   |
| F(3)-P(1)-F(1)      | 90.02(9)   |
| F(6)-P(1)-F(1)      | 179.97(9)  |
| F(3)-P(1)-F(5)      | 179.31(10) |
| F(6)-P(1)-F(5)      | 90.55(10)  |
| F(1)-P(1)-F(5)      | 89.41(9)   |
| F(3)-P(1)-F(2)      | 89.96(9)   |
| F(6)-P(1)-F(2)      | 90.39(9)   |
| F(1)-P(1)-F(2)      | 89.61(9)   |
| F(5)-P(1)-F(2)      | 89.63(9)   |
| F(3)-P(1)-F(4)      | 90.47(11)  |
| F(6)-P(1)-F(4)      | 90.29(10)  |
| F(1)-P(1)-F(4)      | 89.71(9)   |
| F(5)-P(1)-F(4)      | 89.93(10)  |
| F(2)-P(1)-F(4)      | 179.20(9)  |
| C(3)-S(1)-Zn(1)     | 98.48(8)   |
| N(1)-Zn(1)-N(3)     | 126.41(8)  |
| N(1)-Zn(1)-N(4)     | 110.83(8)  |
| N(4)-Zn(1)-N(3)     | 113.32(8)  |
| N(1)-Zn(1)-N(2)     | 78.56(7)   |
| N(3)-Zn(1)-N(2)     | 80.66(7)   |
| N(4)-Zn(1)-N(2)     | 80.06(8)   |
| N(1)-Zn(1)-S(1)     | 85.35(6)   |
| N(3)-Zn(1)-S(1)     | 108.74(6)  |
| N(4)-Zn(1)-S(1)     | 106.86(6)  |
| N(2)-Zn(1)-S(1)     | 163.88(5)  |

---

Symmetry transformations used to generate equivalent atoms:



**Table S-28.** Anisotropic displacement parameters ( $\text{\AA}^2 \times 10^3$ ) for  
 $[\text{Zn}^{\text{II}}(\text{S}^{\text{Me}_2}\text{N}_4(\text{tren}))](\text{PF}_6)$  (**8**).  
The anisotropic displacement factor exponent takes the form:  
 $-2 \pi^2 [h^2 a^{*2} U_{11} + \dots + 2 h k a^* b^* U_{12}]$

|        | U11    | U22    | U33    | U23    | U13     | U12     |
|--------|--------|--------|--------|--------|---------|---------|
| C (1)  | 30 (2) | 25 (1) | 38 (2) | 1 (1)  | -15 (1) | 9 (1)   |
| C (2)  | 43 (2) | 24 (1) | 18 (1) | 1 (1)  | 7 (1)   | -8 (1)  |
| C (3)  | 19 (1) | 16 (1) | 16 (1) | 0 (1)  | -4 (1)  | 1 (1)   |
| C (4)  | 10 (1) | 18 (1) | 15 (1) | -1 (1) | -2 (1)  | 3 (1)   |
| C (5)  | 19 (1) | 23 (1) | 16 (1) | -2 (1) | 1 (1)   | -2 (1)  |
| C (6)  | 17 (1) | 13 (1) | 18 (1) | -1 (1) | -1 (1)  | -2 (1)  |
| C (7)  | 19 (1) | 15 (1) | 20 (1) | 2 (1)  | 0 (1)   | -5 (1)  |
| C (8)  | 21 (1) | 15 (1) | 21 (1) | 2 (1)  | -2 (1)  | 4 (1)   |
| C (9)  | 20 (1) | 24 (1) | 20 (1) | 1 (1)  | -6 (1)  | 4 (1)   |
| C (10) | 24 (1) | 21 (1) | 14 (1) | 1 (1)  | 3 (1)   | -2 (1)  |
| C (11) | 22 (1) | 22 (1) | 18 (1) | 1 (1)  | 6 (1)   | -1 (1)  |
| N (1)  | 13 (1) | 13 (1) | 16 (1) | -1 (1) | 0 (1)   | 0 (1)   |
| N (2)  | 18 (1) | 16 (1) | 14 (1) | 1 (1)  | 1 (1)   | -1 (1)  |
| N (4)  | 15 (1) | 17 (1) | 17 (1) | -2 (1) | -1 (1)  | -1 (1)  |
| N (3)  | 20 (1) | 17 (1) | 15 (1) | 0 (1)  | 1 (1)   | 1 (1)   |
| F (1)  | 21 (1) | 28 (1) | 28 (1) | -4 (1) | 4 (1)   | 7 (1)   |
| F (2)  | 30 (1) | 34 (1) | 18 (1) | 1 (1)  | -1 (1)  | -4 (1)  |
| F (3)  | 24 (1) | 37 (1) | 41 (1) | -6 (1) | 6 (1)   | -11 (1) |
| F (4)  | 31 (1) | 67 (1) | 23 (1) | -1 (1) | -7 (1)  | 14 (1)  |
| F (5)  | 37 (1) | 25 (1) | 38 (1) | 8 (1)  | 11 (1)  | 0 (1)   |
| F (6)  | 32 (1) | 39 (1) | 40 (1) | -3 (1) | 9 (1)   | 19 (1)  |
| P (1)  | 18 (1) | 23 (1) | 17 (1) | 0 (1)  | 2 (1)   | 5 (1)   |
| S (1)  | 20 (1) | 12 (1) | 17 (1) | 1 (1)  | 2 (1)   | 0 (1)   |
| Zn (1) | 15 (1) | 12 (1) | 12 (1) | 0 (1)  | 0 (1)   | -1 (1)  |

**Table S-29.** Hydrogen coordinates (  $\times 10^4$ ) and isotropic displacement parameters ( $\text{\AA}^2 \times 10^3$ ) for  $[\text{Zn}^{\text{II}}(\text{S}^{\text{Me}_2}\text{N}_4(\text{tren}))](\text{PF}_6)$  (**8**).

|         | x    | y     | z     | U (eq) |
|---------|------|-------|-------|--------|
| H (1A)  | 3002 | 1917  | 7762  | 47     |
| H (1B)  | 3465 | 3002  | 8160  | 47     |
| H (1C)  | 2571 | 2092  | 8622  | 47     |
| H (2A)  | 7358 | 1654  | 7962  | 43     |
| H (2B)  | 6531 | 2776  | 7822  | 43     |
| H (2C)  | 5922 | 1773  | 7361  | 43     |
| H (5A)  | 5695 | -392  | 7716  | 29     |
| H (5B)  | 4379 | 437   | 7415  | 29     |
| H (5C)  | 3789 | -556  | 7891  | 29     |
| H (6A)  | 5628 | -1337 | 9094  | 19     |
| H (6B)  | 3704 | -1222 | 8927  | 19     |
| H (7A)  | 3087 | -1031 | 10172 | 22     |
| H (7B)  | 4331 | -2003 | 10136 | 22     |
| H (8A)  | 7272 | -1459 | 10112 | 23     |
| H (8B)  | 7007 | -1731 | 10975 | 23     |
| H (9A)  | 8062 | -89   | 11331 | 26     |
| H (9B)  | 9371 | -638  | 10791 | 26     |
| H (10A) | 5493 | -445  | 11690 | 24     |
| H (10B) | 3973 | -1169 | 11453 | 24     |
| H (11A) | 2536 | 288   | 11003 | 25     |
| H (11B) | 3107 | 549   | 11837 | 25     |
| H (3A)  | 8642 | 395   | 9855  | 20     |
| H (3B)  | 8679 | 1134  | 10497 | 20     |
| H (4A)  | 5126 | 1585  | 11409 | 21     |
| H (4B)  | 3687 | 1889  | 10946 | 21     |

References:

Instrument: Nonius KappaCCD

Nonius (1997). KappaCCD Operations Manual, Delft.

Data Collection Software: Collect, (1998), Data Collection Software, Nonius.

Data Reduction: DENZO

Otinowski, Z., Minor, W., (1996). Processing of X-ray Diffraction Data Collected in Oscillation Mode, *Methods in Enzymology*, 276, 307-326., C. W. Carter, Jr., R. M. Sweet, Eds., Academic Press.

Cell Refinement: HKL SCALEPACK

ibid.

Structure Solution: SIR92

Altomare, A., Cascarano, G., Giacovazzo, C., Burla, M.C., Polidori, G., Camalli, M., (1994)., SIR. *J. Appl. Cryst.* 27, 435-442.

Structure Refinement: SHELXL-97 (Sheldrick, 1997)

Sheldrick, G.M. (1997). SHELXL97, Program for the Refinement of Crystal Structures. Univ. of Gottingen, Germany.

Molecular Graphics: maXus, Zortep

maXus: MacKay, S., Gilmore, C.J., Edwards, C., Tremayne M., Stewart, N., Shankland, K., (1998), "maXus: a computer program for the solution and refinement of crystal structures from diffraction data" University of Glasgow, Scotland, UK, Nonius BV, Delft, The Netherlands and MacScience Co. Ltd., Yokohama, Japan.

Zortep: L. Zsolnai, G. Huttner, (1994), University of Heidelberg.
